# Supplementary material
Source: PubMed Central journal article supplement (PMC4965839)
Supplement: ja6b01323_si_001.pdf [file ja6b01323_si_001.pdf]

## Supplementary Information

### Observation of Binding and Rotation of Methane and Hydrogen within a Functional Metal-Organic Framework

Mathew Savage,<sup>1</sup> Ivan da Silva,<sup>2</sup> Mark Johnson,<sup>3</sup> Joseph H. Carter,<sup>4</sup> Ruth Newby,<sup>4</sup> Mikhail Suyetin,<sup>4</sup> Elena Besley,<sup>4</sup> Pascal Manuel,<sup>2</sup> Svemir Rudić,<sup>2</sup> Andrew N. Fitch,<sup>5</sup> Claire Murray,<sup>6</sup> William I.F. David,<sup>2</sup> Sihai Yang<sup>1\*</sup> and Martin Schröder<sup>1\*</sup>

[<sup>1</sup>] School of Chemistry, University of Manchester, Chemistry Building, Manchester, M13 9PL (UK)

Tel: +44 (0)161 306 9119; [Sihai.Yang@manchester.ac.uk](mailto:Sihai.Yang@manchester.ac.uk); [m.schroder@manchester.ac.uk](mailto:m.schroder@manchester.ac.uk)

[<sup>2</sup>] ISIS Facility, STFC Rutherford Appleton Laboratory, Chilton, Oxfordshire, OX11 0QX (UK)

[<sup>3</sup>] ILL Neutron Facility, Grenoble, 38043 (France)

[<sup>4</sup>] School of Chemistry, University of Nottingham, University Park, Nottingham, NG7 2RD (UK)

[<sup>5</sup>] European Synchrotron Radiation Facility, Grenoble, 38043 (France)

[<sup>6</sup>] Diamond Light Source, Harwell Science Campus, Oxfordshire, OX11 0DE (UK)

## Contents

|                                                                                                        |    |
|--------------------------------------------------------------------------------------------------------|----|
| Materials and measurements .....                                                                       | 3  |
| Synthesis of MFM-300(In).....                                                                          | 3  |
| Powder X-Ray Diffraction (PXRD) measurements .....                                                     | 4  |
| High Resolution Synchrotron X-Ray Powder Diffraction.....                                              | 5  |
| Additional Crystal Structure Views.....                                                                | 7  |
| Thermal Gravimetric Analysis (TGA) Measurements .....                                                  | 8  |
| Elemental Microanalysis .....                                                                          | 9  |
| Gas Adsorption Measurements.....                                                                       | 10 |
| Analysis and Derivation of the Isosteric Heat of Adsorption for H <sub>2</sub> .....                   | 15 |
| Analysis and Derivation of the Isosteric Head of Adsorption for CH <sub>4</sub> .....                  | 17 |
| Grand Canonical Monte Carlo (GCMC) Simulations .....                                                   | 18 |
| Neutron Powder Diffraction (NPD) Experiments and Structure Determination.....                          | 20 |
| Neutron Refinement Structural Data.....                                                                | 22 |
| Tables of Atomic Parameters for Desolvated, D <sub>2</sub> and CD <sub>4</sub> Loaded MFM-300(In)..... | 24 |
| Refined Neutron Profiles .....                                                                         | 31 |
| Fourier Difference Map.....                                                                            | 36 |
| Additional Crystal Structure Views of the Gas Loaded Material.....                                     | 37 |
| Neutron Scattering Measurements.....                                                                   | 46 |
| Molecular Dynamics Modelling of Inelastic Neutron Spectroscopy (INS).....                              | 49 |
| References .....                                                                                       | 50 |

## Materials and measurements

All reagents and solvents were purchased from commercial suppliers and used without further purification. Elemental analyses (C, H and N) were carried out on a CE-440 elemental analyser. Thermal Gravimetric Analysis (TGA) was performed under nitrogen or synthetic air flow (100 ml/min) with a heating rate of 5°C/min using a Perkin-Elmer Pyris 1 Thermogravimetric Analyser. Fourier Transform (FTIR) spectra were recorded using a Nicolet Avatar 360 FT-IR spectrometer in the 4000–400  $\text{cm}^{-1}$  range with an iD5 ATR accessory. Powder X-Ray Diffraction (PXRD) data were collected in flat plate mode over the  $2\theta$  range 5–50° on a PANalytical X'pert MultiPurpose Diffractometer using Cu- $K_\alpha$  radiation ( $\lambda = 1.54056 \text{ \AA}$ ) at 40 kV and 40 mA.

## Synthesis of MFM-300(In)

H<sub>4</sub>L (330 mg, 1.00 mmol), In(NO<sub>3</sub>)<sub>3</sub>·5H<sub>2</sub>O (585 mg, 1.50 mmol) were mixed and dispersed in a DMF/MeCN mixture (30 ml, 2:1 v/v) in a 250 mL glass pressure reactor. The white slurry was acidified with conc. nitric acid (65% 1.0 mL), the vessel sealed and heated at 80 °C for 48 h. The resultant flaky white precipitate was then washed with DMF and dried briefly in air. Yield 347 mg (42 % yield based upon solvent content from microanalysis). Elemental analysis [In<sub>2</sub>(OH)<sub>2</sub>(C<sub>16</sub>H<sub>6</sub>O<sub>8</sub>)]·1.28H<sub>2</sub>O·2.87(C<sub>3</sub>H<sub>7</sub>NO) (% calc/found) C 35.92/35.92, H 3.75/3.53, N 4.88/4.88.

The acetone-exchanged material was prepared by suspending the as-synthesised sample in an excess of acetone for 5 days with frequent exchange of solvent. Elemental analysis [In<sub>2</sub>(OH)<sub>2</sub>(C<sub>16</sub>H<sub>6</sub>O<sub>8</sub>)]·1.10H<sub>2</sub>O·1.76(C<sub>3</sub>H<sub>6</sub>O) (% calc/found) C 35.91/35.91, H 2.94/2.94, N 0.00/0.00. Selected IR(ATR):  $\nu/\text{cm}^{-1} = 3501$  (br), 1705 (s), 1610 (s), 1550 (br), 1418 (br), 1359 (s), 1220 (s), 1089 (w), 782 (s), 748 (s).

## Powder X-Ray Diffraction (PXRD) measurements

Powder X-Ray Diffraction patterns were collected for both the as synthesised and acetone exchanged material and show a flat background, with a low amorphous content and sharp peaks. Pawley fits of the diffraction patterns were calculated with the Bruker TOPAS software suite and are shown to be a good match with the experimental measurement with low residuals and no un-indexed peaks. The calculated unit cell parameters are consistent with those derived from the single crystal experiment.

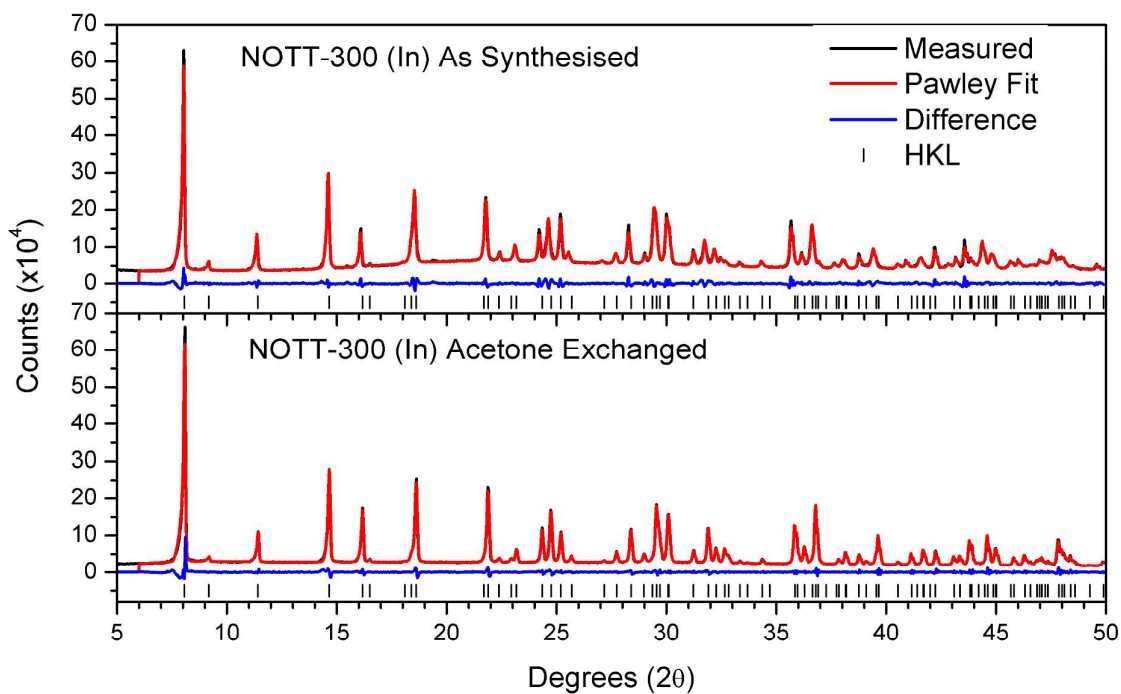

Figure S1 PXRD patterns of as-synthesised and acetone-exchanged MFM-300(In)

## High Resolution Synchrotron X-Ray Powder Diffraction

High resolution synchrotron X-ray powder diffraction (PXRD) data were collected at Beamline ID31 of the ESRF [ $\lambda = 0.49589(2)$  Å] and I11 of Diamond Light Source using multi-analysing crystal-detectors (MACs)<sup>1</sup> and monochromated radiation [ $\lambda = 0.827136(2)$  Å]. The powder sample of MFM-300(In) was dried in air and ground for 10 min before loading into a capillary tube (0.7 mm diameter). The powder pattern was first indexed on a body-centred tetragonal lattice and the independent unit cell parameters were refined using TOPAS. The structure solutions were initially established by considering the structure of the MFM-300(Al) framework with an expansion of unit cell volume of ~15% ongoing from Al to In, and the residual electron density maps were further developed from subsequent difference Fourier analysis using TOPAS. The final structure refinement of MFM-300(In) was carried out using the Rietveld method<sup>2</sup> with isotropic displacement parameters for all atoms. The highly disordered solvent molecules (DMF, CH<sub>3</sub>CN and water) in the pores could not be located and modelled, and therefore were treated as discrete water molecules in the refinement. A total of 40 disordered water molecules per unit cell were found within the channels and included in the final structure refinement for MFM-300(In)-solv. The final stage of the Rietveld refinement involved soft restraints to the C-C bond lengths within the benzene rings and carboxylate groups.

**Crystal data for MFM-300(In)-solv:** [In<sub>2</sub>(OH)<sub>2</sub>(C<sub>16</sub>H<sub>6</sub>O<sub>8</sub>)](H<sub>2</sub>O)<sub>5</sub>. White powder. Tetragonal, space group *I*4<sub>1</sub>22,  $a = b = 15.55796(3)$ ,  $c = 12.31160(2)$  Å,  $V = 2980.02(1)$  Å<sup>3</sup>,  $M = 679.9$ ,  $T = 273(2)$  K,  $Z = 4$ . The final Rietveld plot corresponds to satisfactory crystal structure model ( $R_{\text{Bragg}} = 0.036$ ) and profile ( $R_{\text{p}} = 0.054$  and  $R_{\text{wp}} = 0.072$ ) indicators with a goodness-of-fit parameter of 2.41.

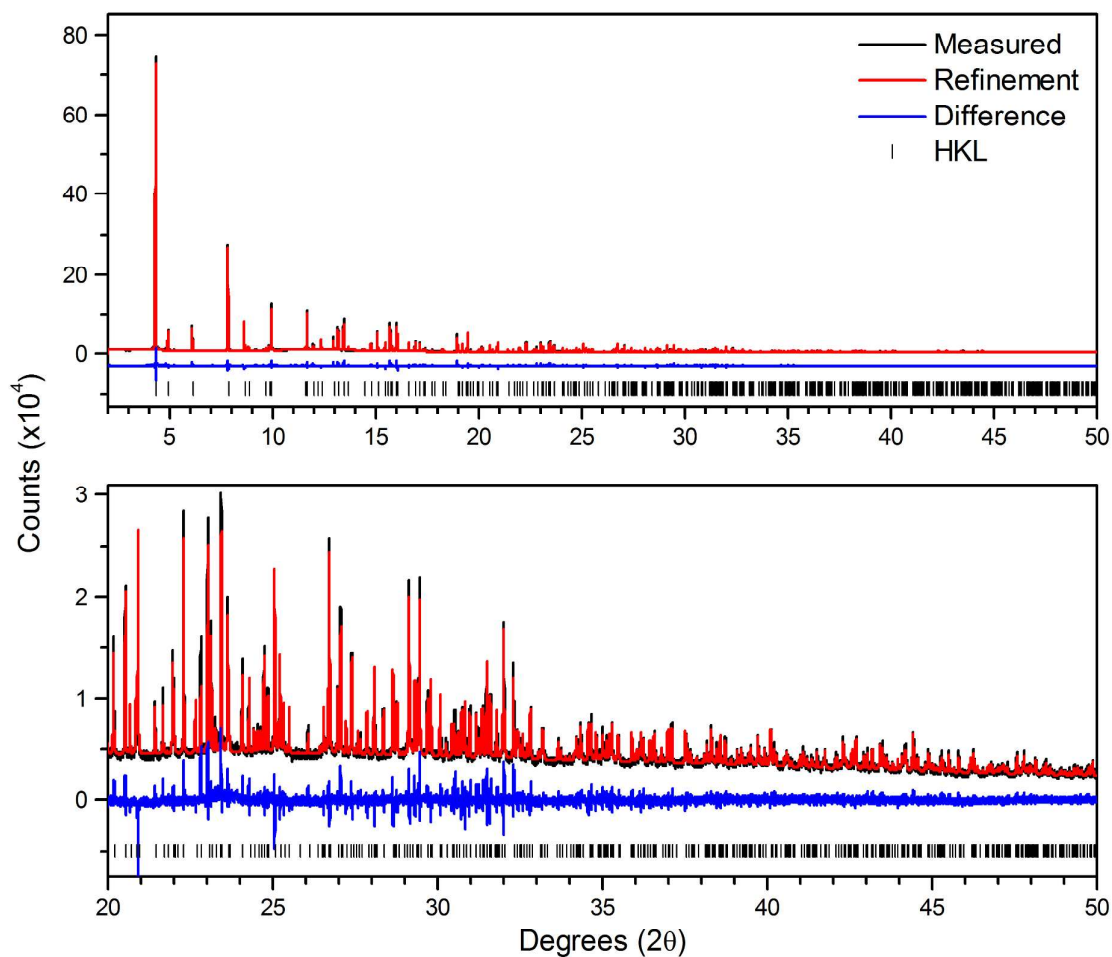

Figure S2 PXRD patterns [observed (black), calculated (red) and difference (blue)] for the Rietveld refinement of the as-synthesised MFM-300(In) [ $\lambda = 0.827136(2) \text{ \AA}$ ]; Top full data range, Bottom, high angle data ( $2\theta = 20\text{-}50^\circ$ ) scaled up to show the quality of fit between the observed and the calculated patterns.

## Additional Crystal Structure Views

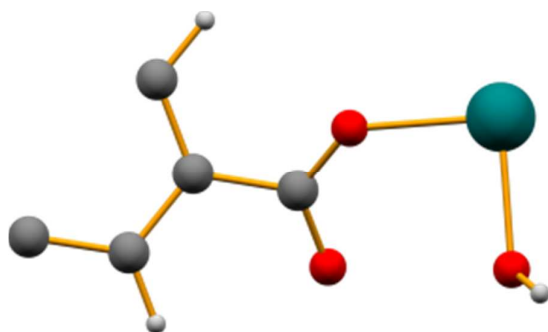

Figure S3 View of the asymmetric unit of MFM-300(In)

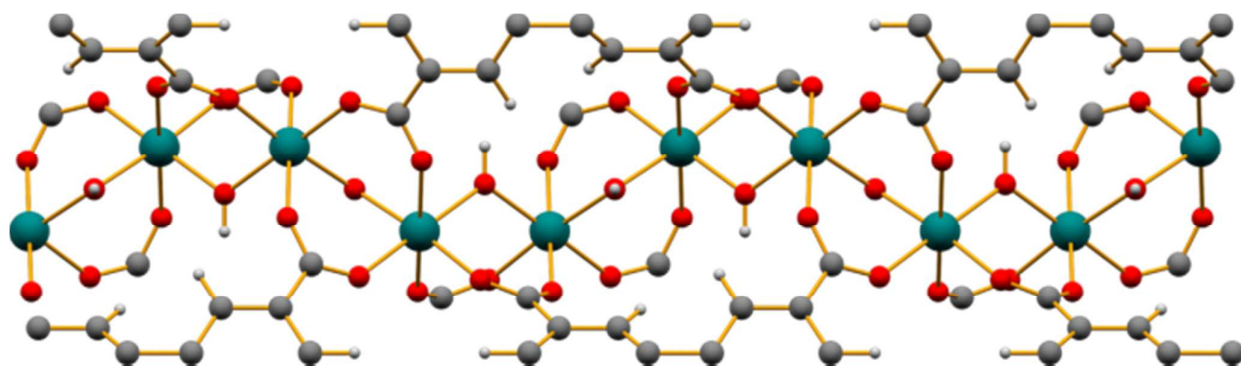

Figure S4 View of the indium oxide chain of MFM-300(In)

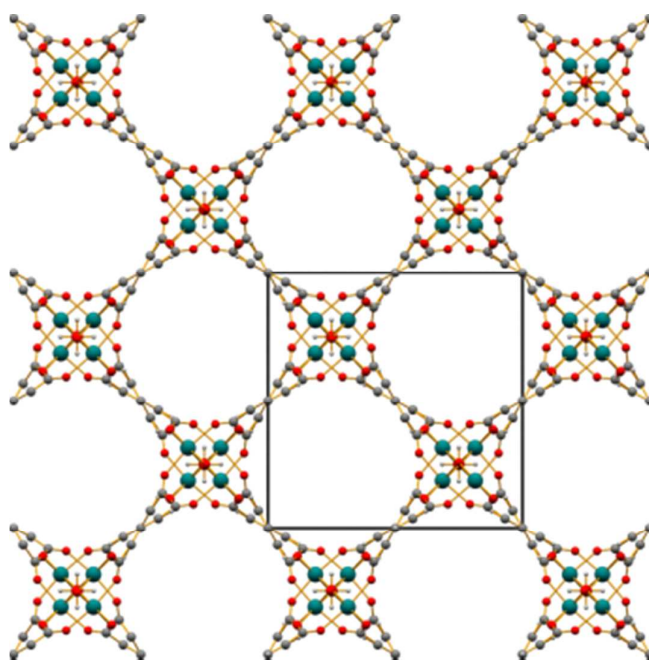

Figure S5 View of extended framework of MFM-300(In) down the c axis showing the unit cell.

## Thermal Gravimetric Analysis (TGA) Measurements

The uncoordinated solvent molecules in MFM-300(In) can be readily exchanged for acetone and removed by heating at 120 °C either under a flow of N<sub>2</sub> gas or *in vacuo*. TGA measurements show that the as synthesised sample loses solvent slowly between 35 and 300 °C, while the acetone-exchanged sample loses solvent rapidly between 35 and 200 °C, giving the fully desolvated material MFM-300(In). This is followed by a significant loss at *ca.* 400 °C, corresponding to the decomposition of the framework.

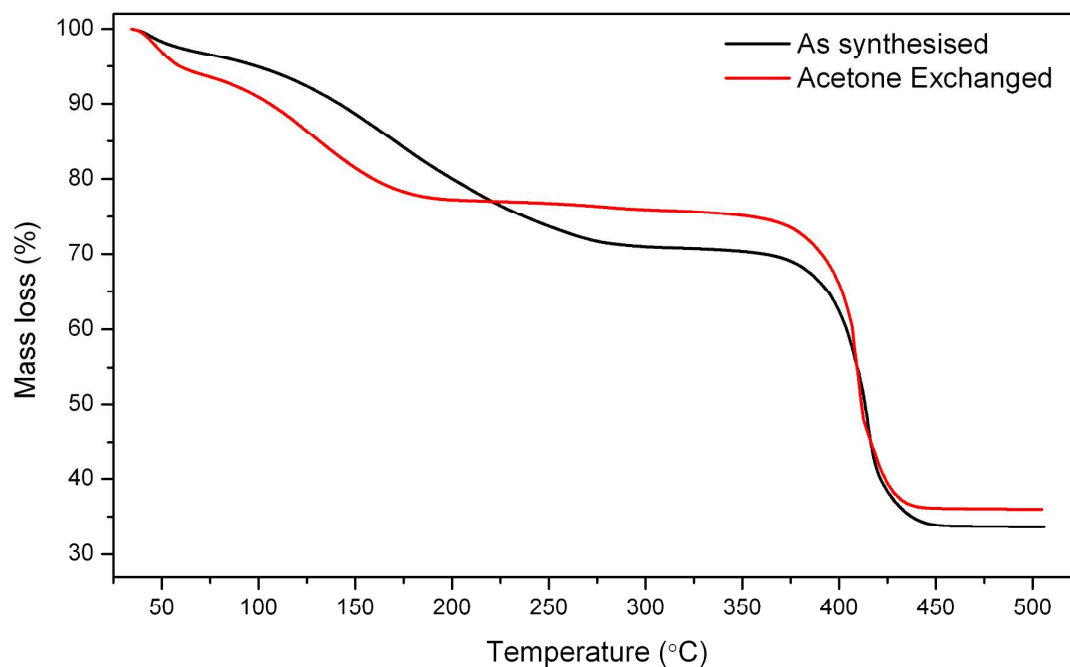

Figure S6 Comparison of TGA plots for as synthesised MFM-300(In) and acetone-exchanged MFM-300(In) under air flows.



## Elemental Microanalysis

Calculated solvent content from elemental analysis correlates with TGA mass losses; As synthesised material;  $[\text{In}_2(\text{OH})_2(\text{C}_{16}\text{H}_6\text{O}_8)] \cdot 1.28\text{H}_2\text{O} \cdot 2.87(\text{C}_3\text{H}_7\text{NO})$  (% calc/found) C 35.92/35.92, H 3.75/3.53, N 4.88/4.88. The mass loss of 1.9 wt% between 35 and 100 °C correlates to 1.27 H<sub>2</sub>O molecules while the mass loss of 26.5 wt% between 100 and 300 °C correlates with the loss of 2.9 DMF molecules.

Acetone exchanged material;  $[\text{In}_2(\text{OH})_2(\text{C}_{16}\text{H}_6\text{O}_8)] \cdot 1.10\text{H}_2\text{O} \cdot 1.76(\text{C}_3\text{H}_6\text{O})$  (% calc/found) C 35.91/35.91, H 2.94/2.94, N 0.00/0. The mass loss of 5.4 wt% between 35 and 100 °C corresponds to the loss of 0.92 acetone molecules, while the mass loss of 18.8 wt% between 100 and 200 °C corresponds to 1.73 acetone and 1.12 H<sub>2</sub>O molecules.

A sample of the acetone exchanged material was degassed at 120 °C and  $1 \times 10^{-6}$  mBar for 20 hours to give a dry, desolvated material. This was then exposed to the atmosphere before loading into the elemental analyser;  $[\text{In}_2(\text{OH})_2(\text{C}_{16}\text{H}_6\text{O}_8)] \cdot 0.73\text{H}_2\text{O}$  (% calc/found) C 31.87/31.87, H 1.58/1.32, N 0/0. The presence of atmospheric H<sub>2</sub>O indicates that the acetone solvent can be removed under these conditions.

| Material                                                                                                                               | Calculated |      |      | Experimental |      |      |
|----------------------------------------------------------------------------------------------------------------------------------------|------------|------|------|--------------|------|------|
|                                                                                                                                        | C          | H    | N    | C            | H    | N    |
| $[\text{In}_2(\text{OH})_2(\text{C}_{16}\text{H}_6\text{O}_8)] \cdot 1.28\text{H}_2\text{O} \cdot 2.87(\text{C}_3\text{H}_7\text{NO})$ | 35.92      | 3.75 | 4.88 | 35.91        | 3.53 | 4.88 |
| $[\text{In}_2(\text{OH})_2(\text{C}_{16}\text{H}_6\text{O}_8)] \cdot 1.10\text{H}_2\text{O} \cdot 1.76(\text{C}_3\text{H}_6\text{O})$  | 35.91      | 2.94 | 0    | 35.91        | 2.94 | 0    |
| $[\text{In}_2(\text{OH})_2(\text{C}_{16}\text{H}_6\text{O}_8)] \cdot 0.73\text{H}_2\text{O}$                                           | 31.87      | 1.58 | 0    | 31.87        | 1.32 | 0    |

Table S1 Calculated and experimental elemental analytical data for as-synthesised, acetone exchanged and desolvated MFM-300(In).

## Gas Adsorption Measurements

Medium pressure (0 – 20 bar) gravimetric gas adsorption and desorption data were collected using an IGA-003 system (Hiden Isochema, Warrington, UK) equipped with a turbomolecular pumping system backed by a diaphragm pump. H<sub>2</sub> isotherms (0-20 bar) were recorded at 77 and 87 K using liquid nitrogen and argon respectively. CH<sub>4</sub> isotherms (0-20 bar) were recorded at 110, 215 and 245 K by a liquid nitrogen cryo-furnace, 195 K by dry ice/acetone, 273, 283, 293, 303, and 308 K by a temperature controlled water-bath. High pressure (0 – 50 bar) gravimetric gas adsorption and desorption data were collected using a Xemis system (Hiden Isochema, Warrington, UK) equipped with a turbomolecular pumping system backed by a diaphragm pump. CH<sub>4</sub> isotherms (0 – 50 bar) were recorded at 273, 283, 293, 298 and 303 K using a temperature controlled water-bath.

The kinetic profile of each adsorption or desorption step was monitored by the system software from 2 minutes after each pressure has been achieved, and data collected until an exponential model indicated that 99% of the expected equilibrium has been achieved. Typically all adsorption steps reached the 99% adsorption criterion within 5 minutes of the pressure being achieved. The experimentally measured excess adsorption values were converted into the total adsorption values by applying a correction for the buoyancy of the adsorbent, sample cell and adsorbed gas. The buoyancy correction was applied using system software included with the gas adsorption apparatus, taking into account the density and mass of all components of the balance including hang-downs, sample holder, sample and counterweight and correcting for the density of the adsorbate gas using values from the NIST REFPOP database.

Acetone exchanged samples were loaded into the system and degassed at 120 °C and  $1 \times 10^{-6}$  mbar for 20 hours to give a dry, desolvated material of typical mass *ca.* 80 mg. Research grade N<sub>2</sub> was purchased from BOC and used as received. 99.995+ % grade H<sub>2</sub> and CH<sub>4</sub> was purchased from Air Liquide and used as received.

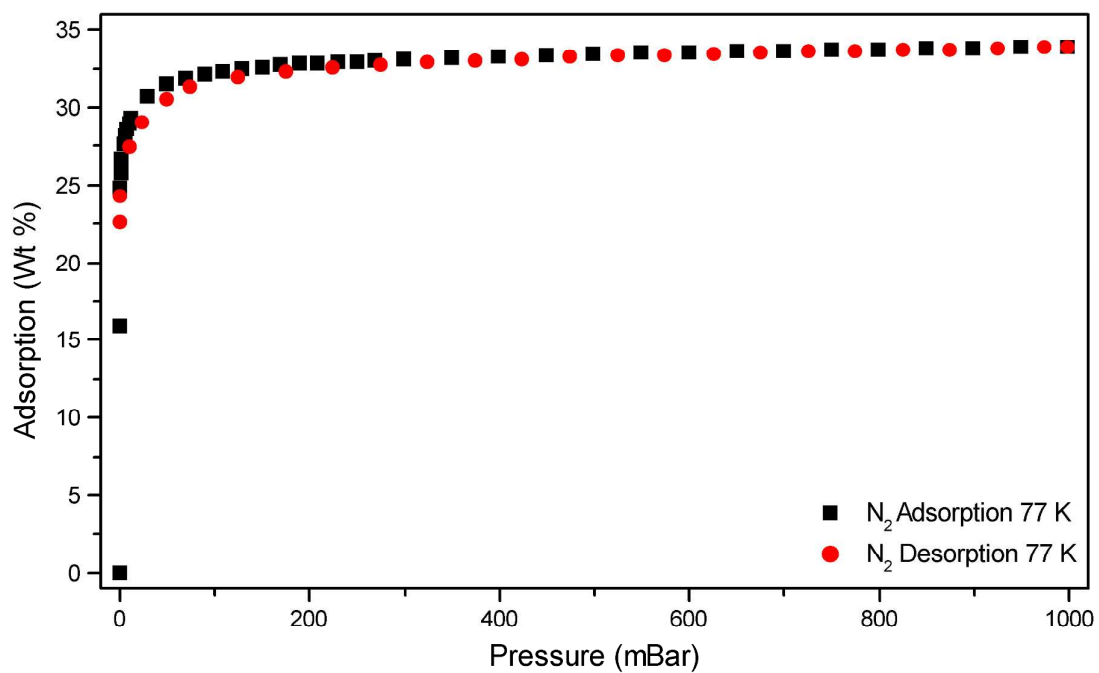

Figure S7 Nitrogen adsorption of MFM-300(In) at 77 K.

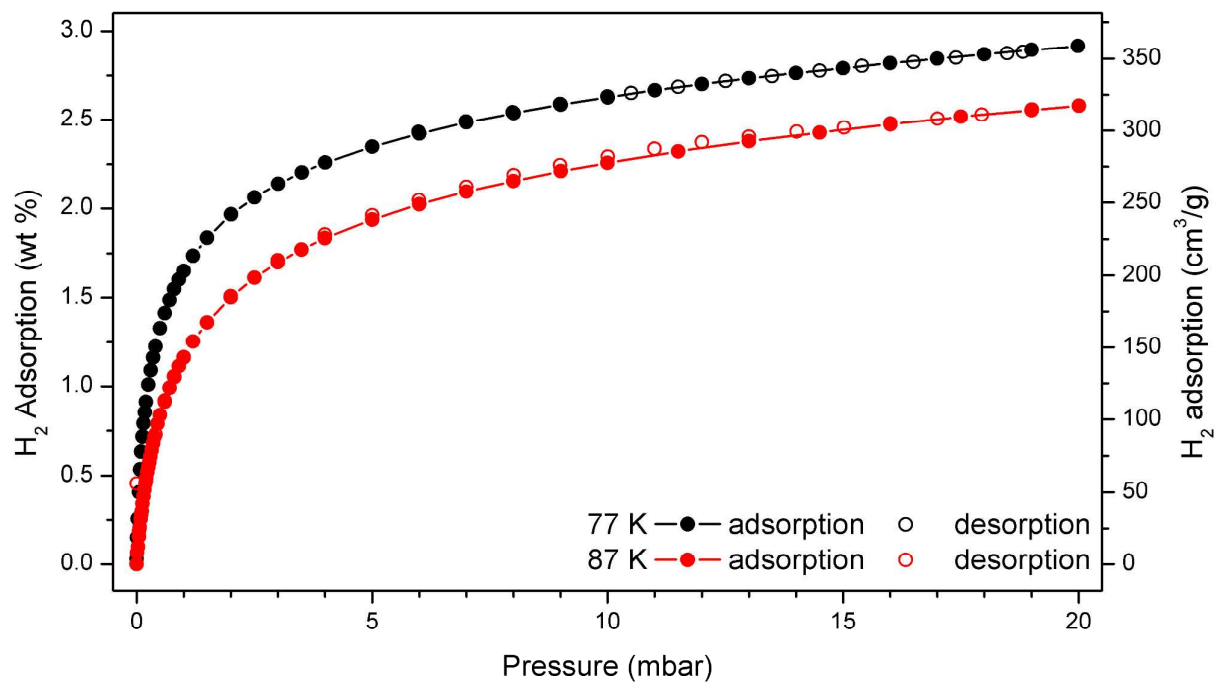

Figure S 8 H<sub>2</sub> adsorption and desorption in MFM-300(In) in terms of wt% and cm<sup>3</sup>/g.

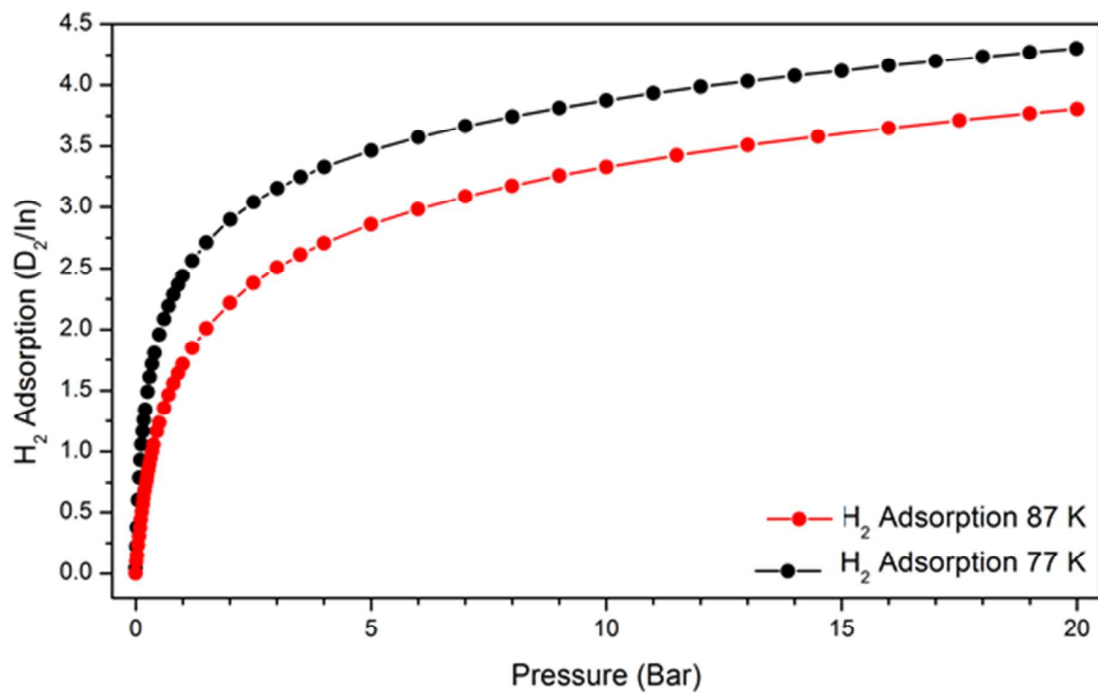

Figure S9 Adsorption of H<sub>2</sub> in MFM-300(In) in terms of H<sub>2</sub> per indium atom.

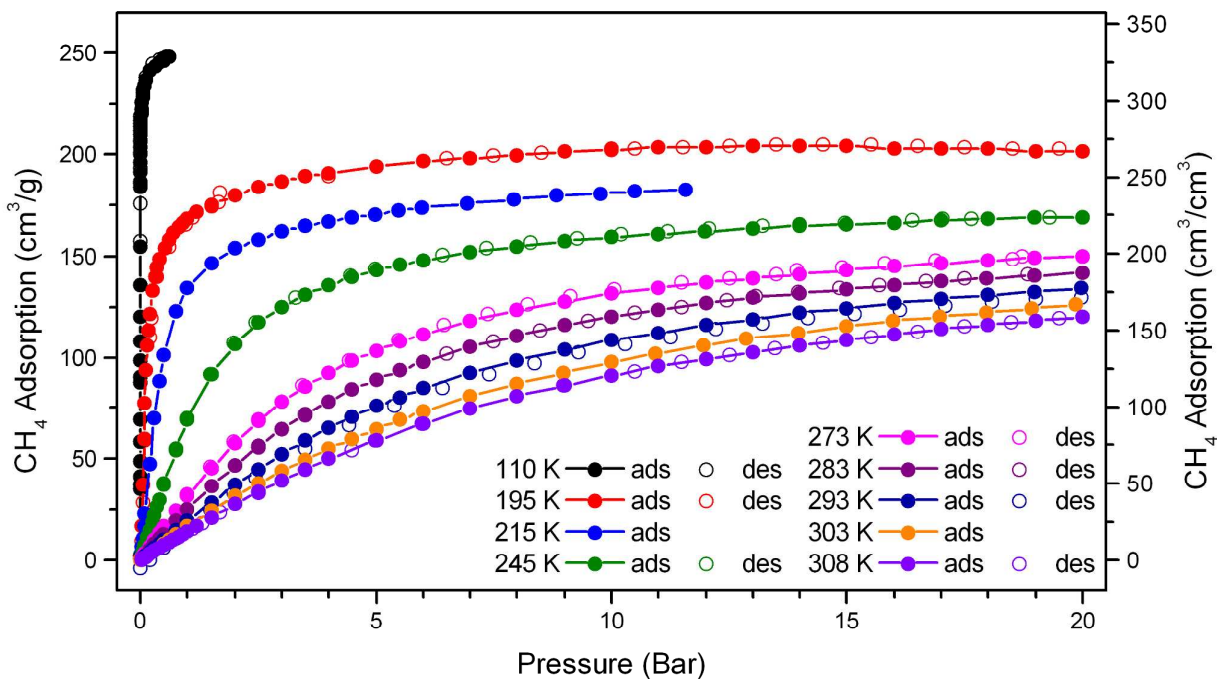

Figure S10 CH<sub>4</sub> adsorption and desorption isotherms in MFM-300(In) in terms of cm<sup>3</sup>/g and cm<sup>3</sup>/cm<sup>3</sup>.

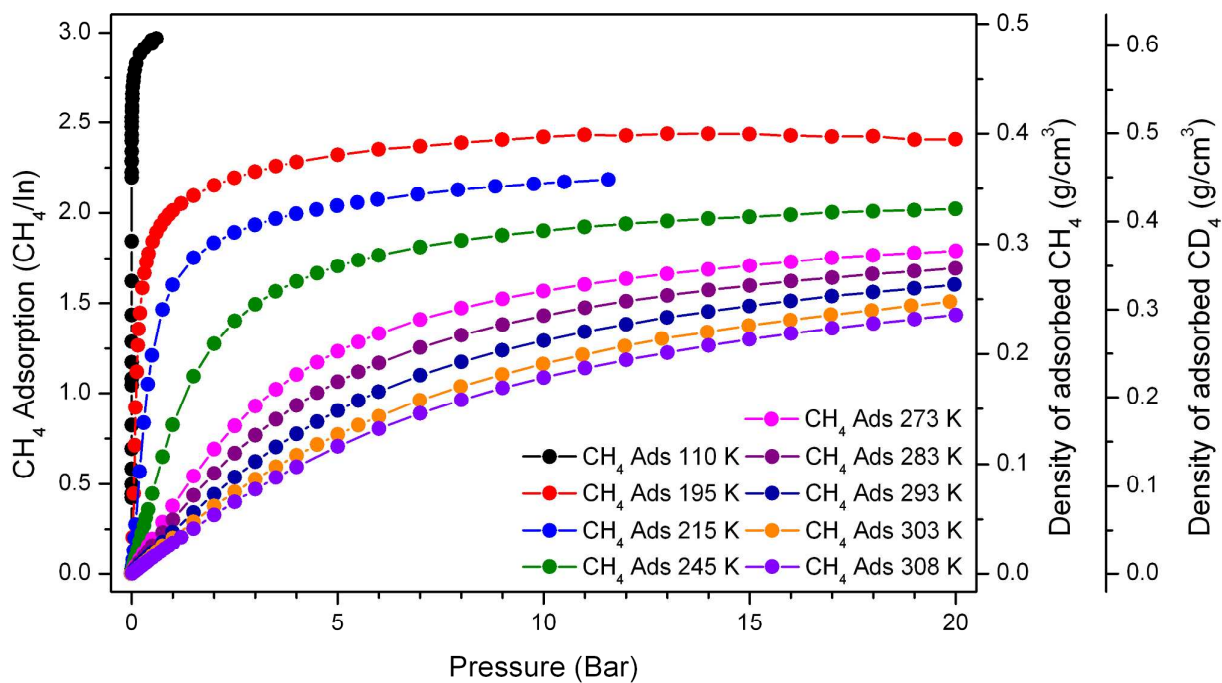

Figure S11 Adsorption of CH<sub>4</sub> in MFM-300(In) in terms of CH<sub>4</sub> per indium atom and the corresponding density of adsorbed CH<sub>4</sub> and CD<sub>4</sub> within the pores of the material.

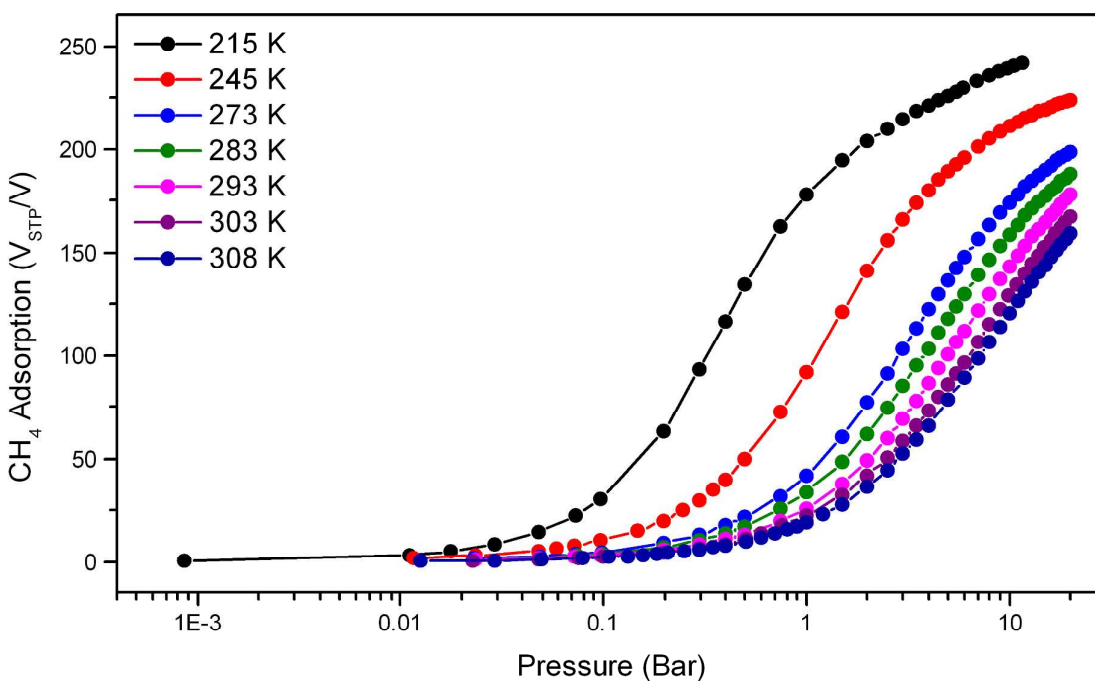

Figure S12 Comparison of the CH<sub>4</sub> adsorption isotherms at 195-308 K of MFM-300(In) in logarithmic view, confirming the absence of distinct adsorption steps

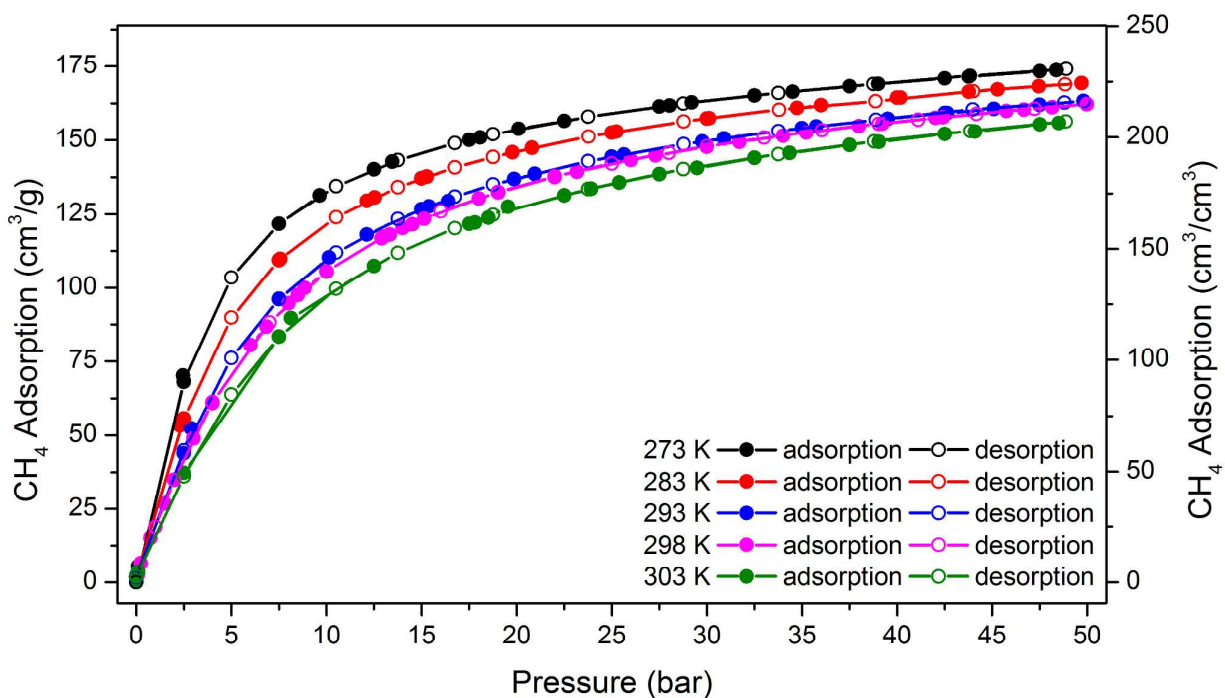

Figure S13 Experimental high pressure (0 – 50 bar) CH<sub>4</sub> adsorption and desorption isotherms in MFM-300(In) in terms of cm<sup>3</sup> g<sup>-1</sup> and cm<sup>3</sup> cm<sup>-3</sup>.

## Analysis and Derivation of the Isothermic Heat of Adsorption for H<sub>2</sub>

The isothermic enthalpy of adsorption,  $Q_{st}$  for hydrogen was determined by fitting the adsorption isotherms at 77 and 87 K to the Virial equation (1);

$$\ln P = \ln n + \frac{1}{T} \sum_{i=0}^m a_i n^i + \sum_{j=0}^n b_j n^j \quad (1)$$

Where  $P$  is the pressure in millibar,  $n$  is the amount of gas adsorbed in mmol/g,  $T$  is the temperature in K,  $a_i$  and  $b_j$  are Virial coefficients and  $m$  and  $n$  represent the number of coefficients. The global Virial fitting has an  $R^2$  greater than 0.99, indicating the consistency of the isotherm data and the quality of the fit.

The values of the Virial coefficients  $a_0$  through  $a_m$  were then used to calculate the isothermic heat of adsorption using equation (2);

$$Q_{st} = -R \sum_{i=0}^m a_i n^i \quad (2)$$

Where  $Q_{st}$  is the coverage-dependant isothermic heat of adsorption in KJ mol<sup>-1</sup> and  $R$  is the ideal gas constant.

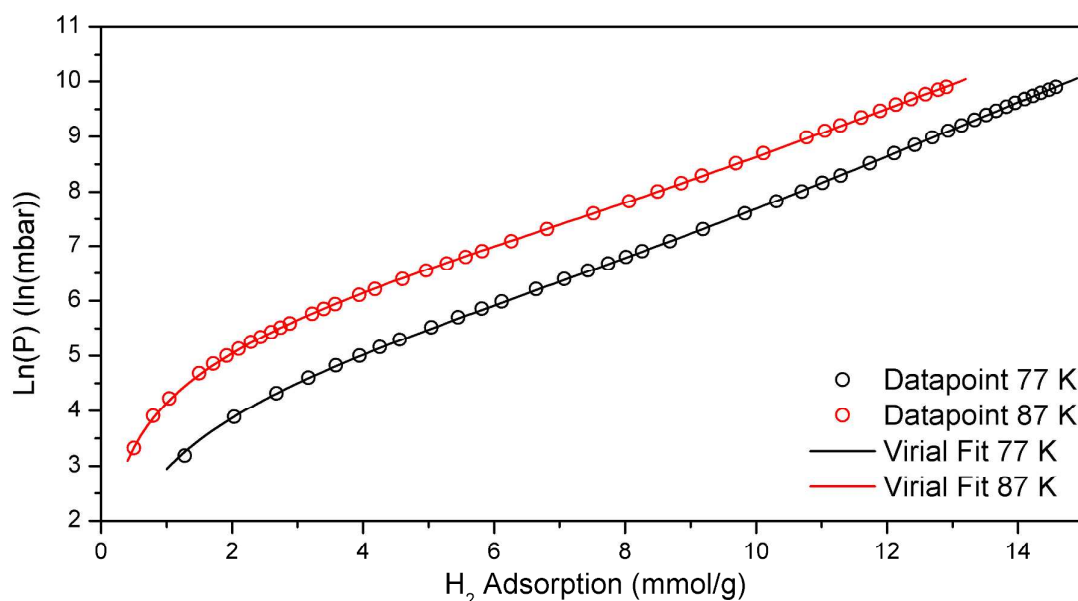

Figure S14 Virial fitting (1) of H<sub>2</sub> adsorption in MFM-300 (In) at 77 and 87 K.

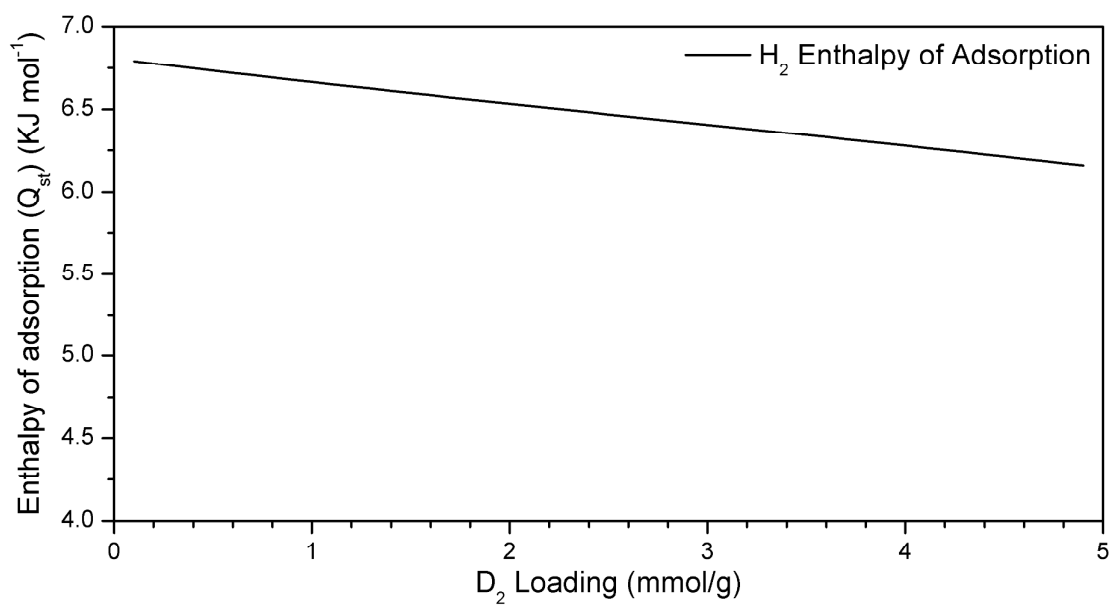

Figure S15 Variation of isosteric enthalpy ( $Q_{st}$ ) as a function of  $\text{H}_2$  loading.



## Analysis and Derivation of the Isothermic Head of Adsorption for CH<sub>4</sub>

The isosteric enthalpy ( $\Delta H$ ) and entropy ( $\Delta S$ ) for methane was determined by fitting ambient temperature adsorption isotherms to the Van t' Hoff equation (3) at a number of gas loadings;

$$\ln P = \frac{-\Delta H}{RT} + \frac{\Delta S}{R} \quad (3)$$

Where  $P$  is pressure in Pa,  $T$  is the temperature, and  $R$  is the ideal gas constant. All linear fittings show  $R^2$  above 0.99 indicating the consistency of the isotherm data quality of the fit.

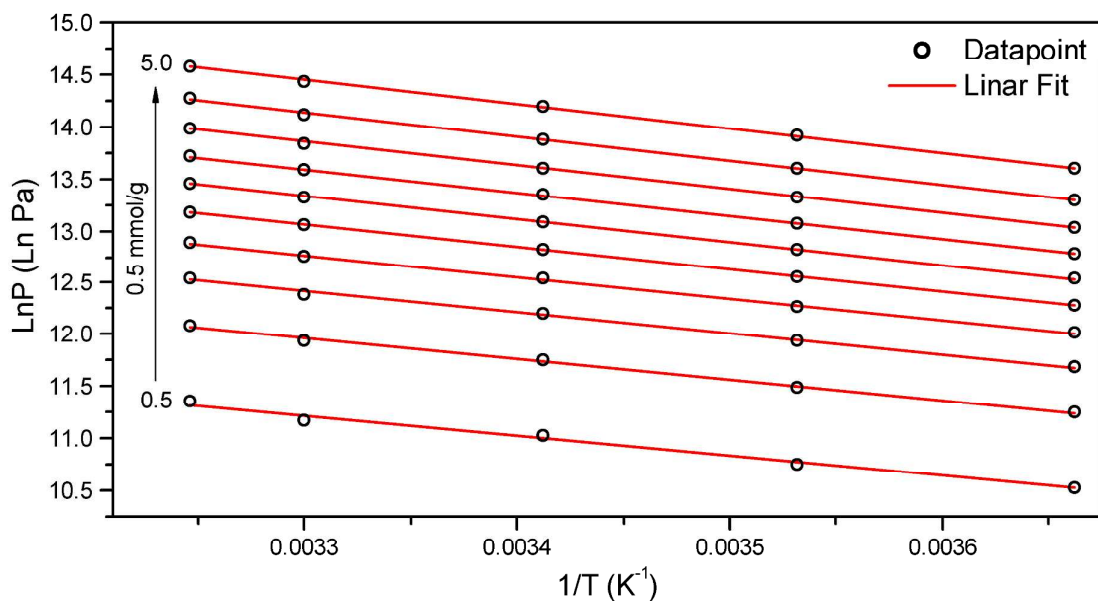

Figure S16 Linear fitting of  $1/T$  vs  $\ln P$  to determine the isosteric heat of adsorption by the van t' Hoff method.

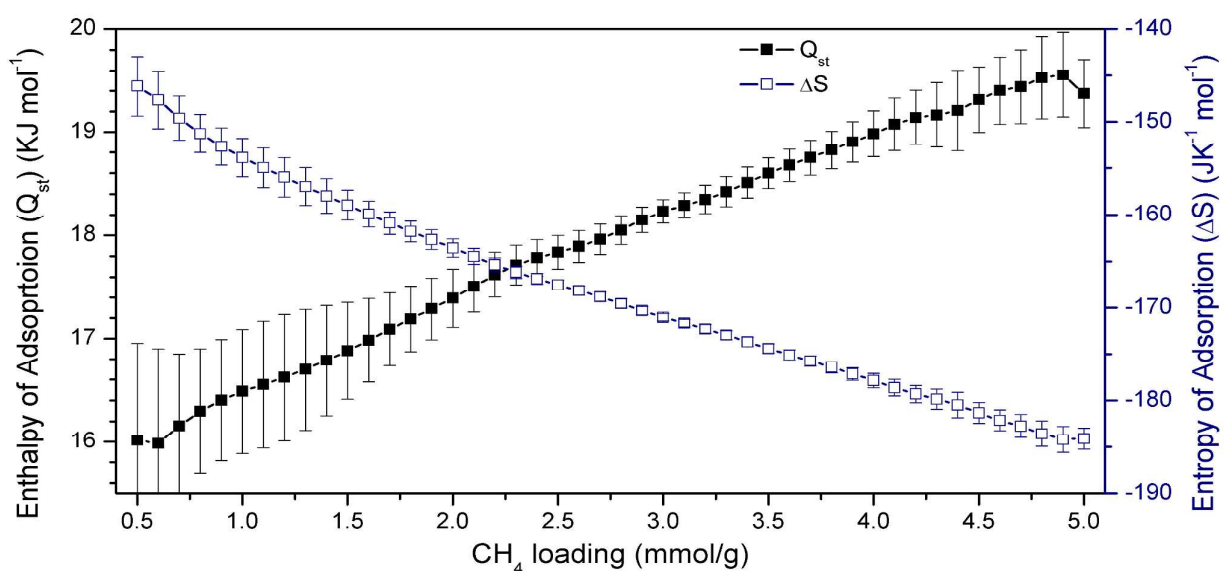

Figure S17 Variation of isosteric enthalpy ( $Q_{st}$ ) and entropy ( $\Delta S$ ) as a function of CH<sub>4</sub> loading.

## Grand Canonical Monte Carlo (GCMC) Simulations

Grand Canonical Monte Carlo (GCMC) simulations were performed using the MUSIC simulation suite<sup>3</sup> to calculate the adsorption of CH<sub>4</sub> molecules in MFM-300(In). The GCMC simulations involved 3·10<sup>6</sup> steps of equilibration, followed by 3·10<sup>6</sup> steps of the production run. The CH<sub>4</sub> molecule was described by TraPPE force field<sup>4</sup> using a set of united-atom Lennard-Jones interaction parameters  $\sigma_O=3.73 \text{ \AA}$ ,  $\epsilon_O/k_B = 148.0 \text{ K}$ . All atoms in the MOF structure were described by the universal force field (UFF)<sup>5</sup> with scaling techniques applied, developed by Perez-Pellitero et al.<sup>6</sup> parameters of MOF atoms for GCMC simulations were scaled:  $\text{sigma\_new} = \text{sigma}\cdot 0.95$  and  $\text{eps\_new} = \text{eps}\cdot 0.69$ . The simulation cell contained 12 (2x2x3) unit cells with periodic boundary conditions. The fugacity has been calculated from the Peng-Robertson equation of state<sup>7</sup> and the MOF and guest molecules were considered to be rigid. A Lennard-Jones potential has been used to describe the van der Waals interactions with a cut-off distance of 12.8 Å.

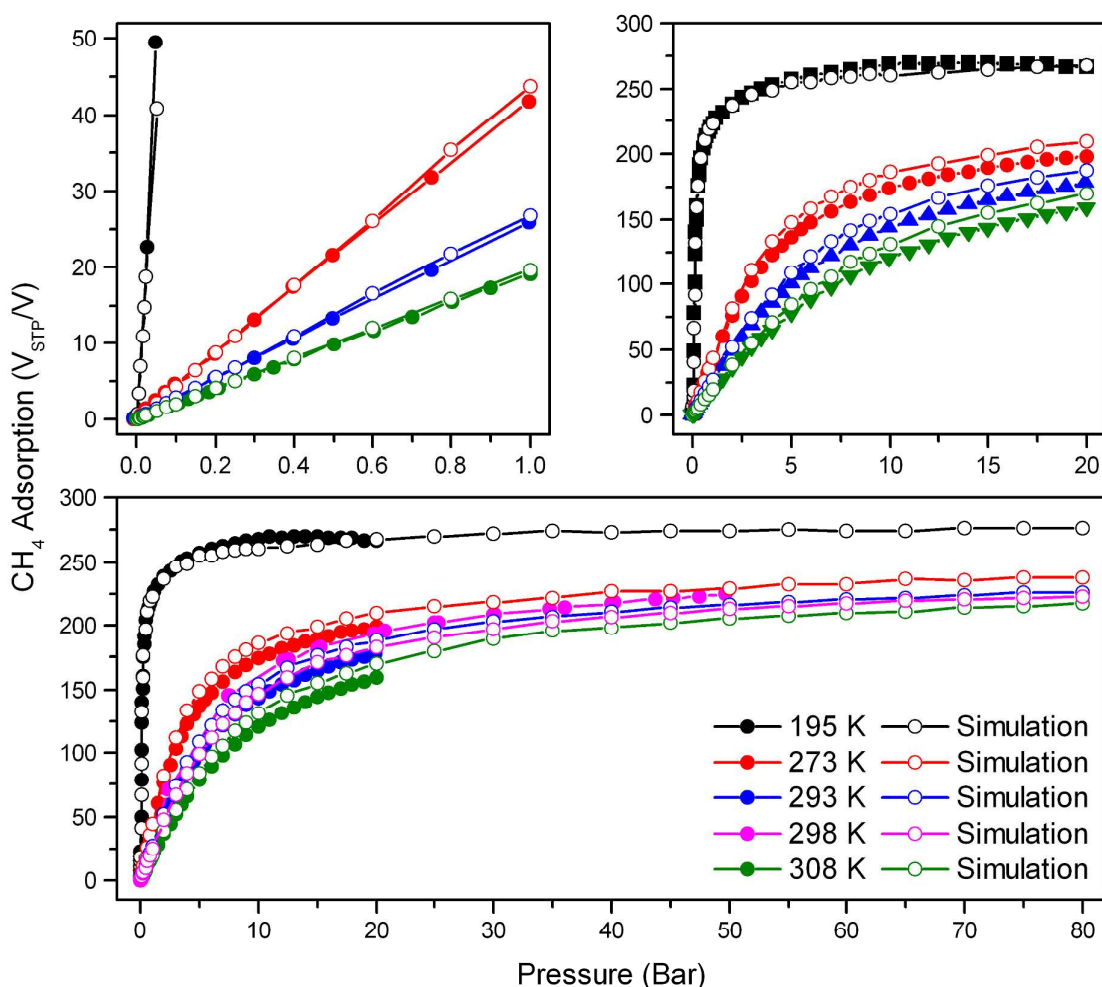

Figure S18 Comparison of the simulated and experimental adsorption isotherms for CH<sub>4</sub> in MFM-300(In) at 195, 273, 293 and 308 K. Excellent agreements between the experiment and simulation are observed up to 20 bar.

## Positions of Adsorbed Methane Molecules as Determined by GCMC Modelling

Snapshots were taken of the Grand Canonical Monte Carlo (GCMC) modelling to gain an insight onto the packing of methane molecules within the pore of MFM-300 (In). These data allow us a qualitative insight into the filling of the porous structure of MFM-300 (In) under a variety of conditions.

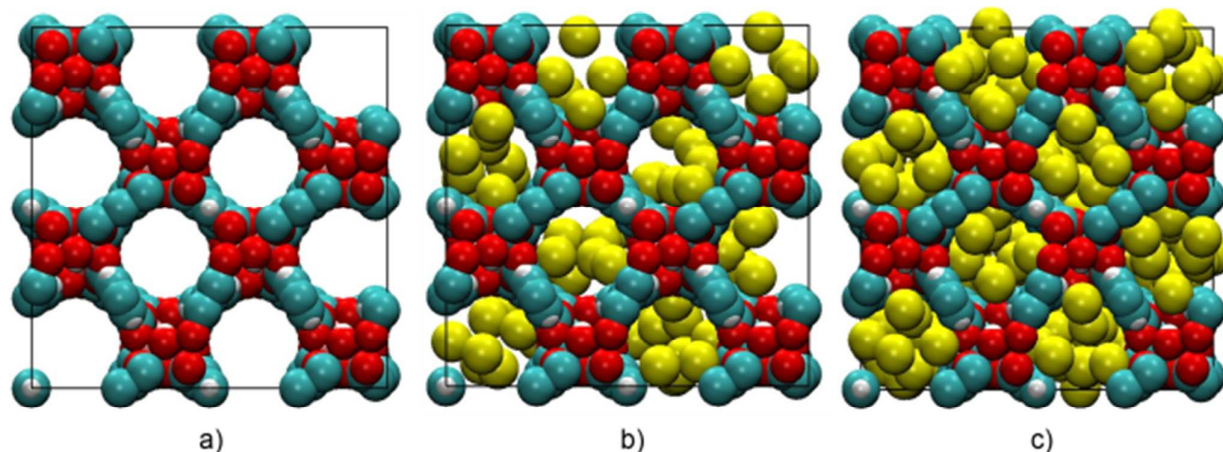

Figure S19 GCMC calculation snapshot of a) desolvated MFM-300(In); and CH<sub>4</sub>-loaded MFM-300(In) at 195 and b) 0.1 bar and c) 80 bar.

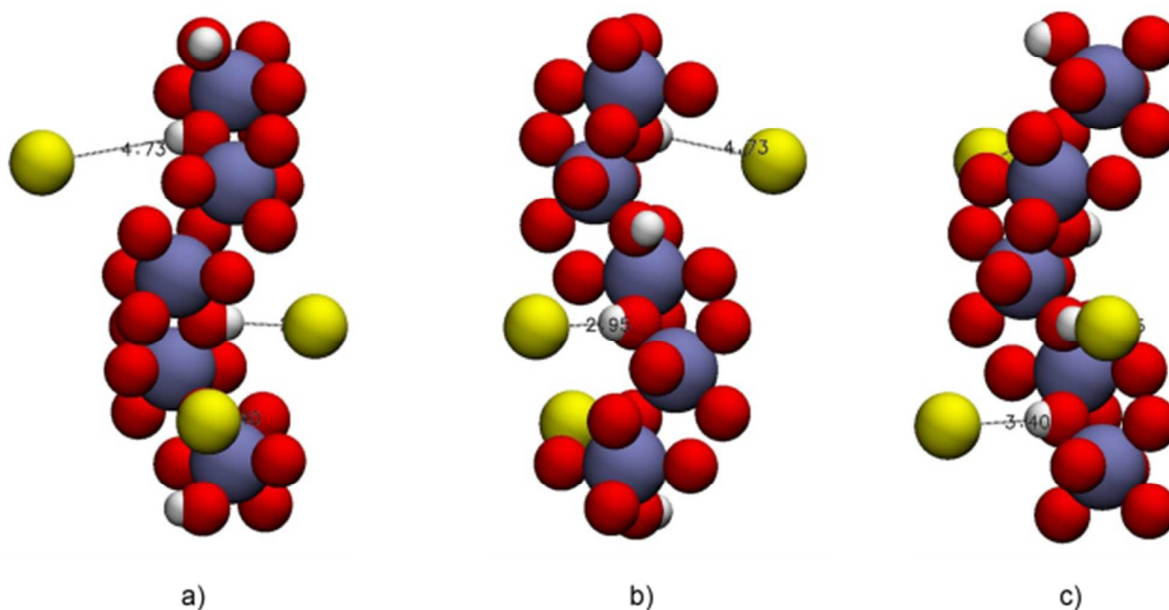

Figure S20 Views of interactions of the In-OH-In carboxylate chain with CH<sub>4</sub>

## Neutron Powder Diffraction (NPD) Experiments and Structure Determination

Neutron powder diffraction experiments were carried out at WISH, a long wavelength powder and single crystal neutron diffractometer at the ISIS Facility at the Rutherford Appleton Laboratory (UK).<sup>6</sup> The instrument views a solid CH<sub>4</sub> moderator providing a high flux of cold neutrons with a large bandwidth, transported to the sample *via* an elliptical guide. The WISH divergent jaws system allows for tuning the resolution according to the need of the experiment; in this case, it was setup in high resolution mode. The WISH detectors are 1m long, 8mm diameter pixellated <sup>3</sup>He tubes positioned at 2.2 m from the sample and arranged on a cylindrical locus covering 10-170 degrees in 2θ scattering angle. To reduce the background from sample environment, it is equipped with an oscillating radial collimator that defines a cylinder of radius about 22 mm diameter at 90 degrees scattering.

The sample of desolvated MFM-300(In) was loaded into a cylindrical vanadium sample container with an indium vacuum seal and connected to a gas handling system. The sample was degassed at 10<sup>-7</sup> mbar and 100 °C for 1 day to remove any remaining trace guest water molecules. The temperature during data collection was controlled using a helium cryostat (7 ± 0.2 K). D<sub>2</sub> and CD<sub>4</sub> were dosed at 50 and 150 K respectively to ensure that the compound of interest was present in the gas phase when not adsorbed inside the crystalline structure of MFM-300(In). The sample was dosed from a calibrated volume to 1.0, 1.5, 3.0 4.5 and 6.0 D<sub>2</sub> per In and 1.0, 2.0 and 3.0 CD<sub>4</sub> per In. The sample was then slowly cooled to 7 K to ensure the analysis gas was completely adsorbed with no condensation within the cell, sufficient time was then allowed to reach thermal equilibrium and data collected. The adsorbed gas was removed by heating the sample cell to 373 K, accompanied by returning the adsorbed gas to the dosing volume. When 95 % of the dosed gas had been returned, the sample was connected to a turbomolecular pump and degassed at 10<sup>-7</sup> mbar and 373 K for two hours to ensure complete removal of the adsorbed gas.

Rietveld refinements on the NPD patterns of the bare MOF and the samples with various CD<sub>4</sub> loadings were performed using the TOPAS software package. The initial Fourier difference maps were used to find the isosurfaces of the three-dimensional difference scattering-length density distribution for CD<sub>4</sub> molecules. In this treatment the CD<sub>4</sub> molecules were treated as rigid bodies; we first refined the centers of mass, orientations, and

occupancies of the adsorbed  $\text{CD}_4$ , followed by full profile Rietveld refinement including the positions of metals and linkers, together with their corresponding lattice parameters, resulting in satisfactory R-factors. The final refinements on all the parameters including fractional coordinates, thermal parameters, occupancies for both host lattice and adsorbed  $\text{CD}_4$  molecules, and background/profile coefficients yielded very good agreement factors. No restriction of the molecule position was used in the refinement. The total occupancies of  $\text{CD}_4$  molecules obtained from the refinement are also in good agreement with the experimental values for the  $\text{CD}_4$  loading. The refined structural parameters including the refined positions and orientations of the  $\text{CD}_4$  rigid bodies are detailed in Table S2-S3.

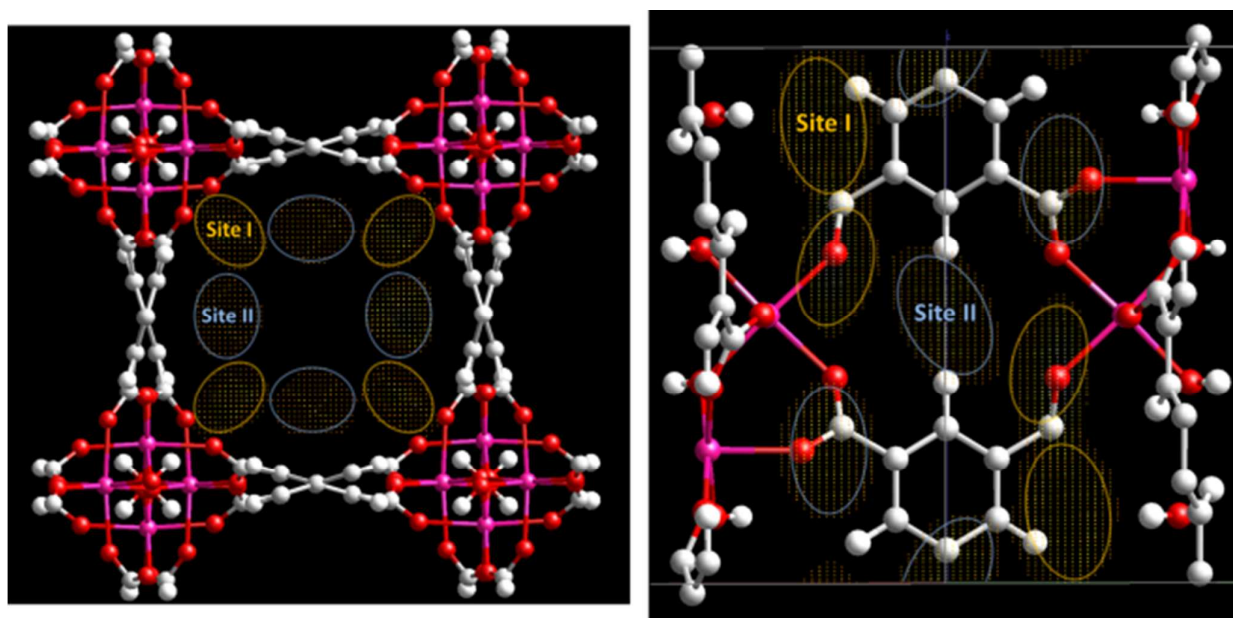

Figure S21 Fourier difference map of the residual nuclear density of MFM-300(In) at a loading of 1.09  $\text{CD}_4$  per In revealing the two different adsorption sites.

## Neutron Refinement Structural Data

|                            | MFM-300(In)<br>Degassed                                              | MFM-300(In)<br>0.90 D <sub>2</sub> per In                                                       | MFM-300(In)<br>1.60 D <sub>2</sub> per In                                                       | MFM-300(In)<br>2.99 D <sub>2</sub> per In                                                       | MFM-300(In)<br>4.83 D <sub>2</sub> per In                                                       | MFM-300(In)<br>6.08 D <sub>2</sub> per In                                                       |
|----------------------------|----------------------------------------------------------------------|-------------------------------------------------------------------------------------------------|-------------------------------------------------------------------------------------------------|-------------------------------------------------------------------------------------------------|-------------------------------------------------------------------------------------------------|-------------------------------------------------------------------------------------------------|
| Chemical formula           | 0.5(C <sub>16</sub> H <sub>8</sub> In <sub>2</sub> O <sub>10</sub> ) | 0.5(C <sub>16</sub> H <sub>8</sub> In <sub>2</sub> O <sub>10</sub> )<br>·(0.90 D <sub>2</sub> ) | 0.5(C <sub>16</sub> H <sub>8</sub> In <sub>2</sub> O <sub>10</sub> )<br>·(1.60 D <sub>2</sub> ) | 0.5(C <sub>16</sub> H <sub>8</sub> In <sub>2</sub> O <sub>10</sub> )<br>·(2.99 D <sub>2</sub> ) | 0.5(C <sub>16</sub> H <sub>8</sub> In <sub>2</sub> O <sub>10</sub> )<br>·(4.83 D <sub>2</sub> ) | 0.5(C <sub>16</sub> H <sub>8</sub> In <sub>2</sub> O <sub>10</sub> )<br>·(6.08 D <sub>2</sub> ) |
| M <sub>r</sub>             | 294.93                                                               | 298.59                                                                                          | 301.38                                                                                          | 306.95                                                                                          | 314.37                                                                                          | 319.39                                                                                          |
| Crystal system             | Tetragonal                                                           | Tetragonal                                                                                      | Tetragonal                                                                                      | Tetragonal                                                                                      | Tetragonal                                                                                      | Tetragonal                                                                                      |
| Space group                | <i>I</i> 4 <sub>1</sub> 22                                           | <i>I</i> 4 <sub>1</sub> 22                                                                      | <i>I</i> 4 <sub>1</sub> 22                                                                      | <i>I</i> 4 <sub>1</sub> 22                                                                      | <i>I</i> 4 <sub>1</sub> 22                                                                      | <i>I</i> 4 <sub>1</sub> 22                                                                      |
| Temperature                | 7 K                                                                  | 7 K                                                                                             | 7 K                                                                                             | 7 K                                                                                             | 7 K                                                                                             | 7 K                                                                                             |
| <i>a</i> (Å)               | 15.49526 (11)                                                        | 15.49394 (9)                                                                                    | 15.49227 (10)                                                                                   | 15.48888 (13)                                                                                   | 15.48281 (12)                                                                                   | 15.49785 (17)                                                                                   |
| <i>c</i> (Å)               | 12.32020 (17)                                                        | 12.31213 (15)                                                                                   | 12.32047 (18)                                                                                   | 12.30827 (19)                                                                                   | 12.3009 (2)                                                                                     | 12.3052 (2)                                                                                     |
| <i>V</i> (Å <sup>3</sup> ) | 2958.12 (6)                                                          | 2955.68 (5)                                                                                     | 2954.64 (6)                                                                                     | 2952.82 (7)                                                                                     | 2948.74 (7)                                                                                     | 2955.51 (8)                                                                                     |
| <i>Z</i>                   | 8                                                                    | 8                                                                                               | 8                                                                                               | 8                                                                                               | 8                                                                                               | 8                                                                                               |
| Sample size (mm)           | Cylinder, 65 x 8                                                     | Cylinder, 65 x 8                                                                                | Cylinder, 65 x 8                                                                                | Cylinder, 65 x 8                                                                                | Cylinder, 65 x 8                                                                                | Cylinder, 65 x 8                                                                                |
| Radiation type             | Neutron                                                              | Neutron                                                                                         | Neutron                                                                                         | Neutron                                                                                         | Neutron                                                                                         | Neutron                                                                                         |
| Scan method                | Time of Flight                                                       | Time of Flight                                                                                  | Time of Flight                                                                                  | Time of Flight                                                                                  | Time of Flight                                                                                  | Time of Flight                                                                                  |
| R <sub>exp</sub>           | 0.754                                                                | 0.371                                                                                           | 0.368                                                                                           | 0.366                                                                                           | 0.361                                                                                           | 0.372                                                                                           |
| R <sub>wp</sub>            | 1.426                                                                | 1.256                                                                                           | 1.430                                                                                           | 1.530                                                                                           | 1.684                                                                                           | 2.026                                                                                           |
| R <sub>p</sub>             | 1.686                                                                | 1.354                                                                                           | 1.408                                                                                           | 1.467                                                                                           | 1.479                                                                                           | 1.597                                                                                           |
| GooF                       | 1.891                                                                | 3.388                                                                                           | 3.388                                                                                           | 4.180                                                                                           | 4.666                                                                                           | 5.451                                                                                           |
| CCDC                       | 1043464                                                              |                                                                                                 |                                                                                                 |                                                                                                 |                                                                                                 |                                                                                                 |

Table S2 NPD structural refinement parameters of desolvated MFM-300 and at three loadings of D<sub>2</sub>.

|                            | MFM-300(In)<br>Degassed                                              | MFM-300(In)<br>1.09 CD <sub>4</sub> per In                                                       | MFM-300(In)<br>2.09 CD <sub>4</sub> per In                                                       | MFM-300(In)<br>3.11 CD <sub>4</sub> per In                                                       |
|----------------------------|----------------------------------------------------------------------|--------------------------------------------------------------------------------------------------|--------------------------------------------------------------------------------------------------|--------------------------------------------------------------------------------------------------|
| Chemical formula           | 0.5(C <sub>16</sub> H <sub>8</sub> In <sub>2</sub> O <sub>10</sub> ) | 0.5(C <sub>16</sub> H <sub>8</sub> In <sub>2</sub> O <sub>10</sub> )<br>·(1.09 CD <sub>4</sub> ) | 0.5(C <sub>16</sub> H <sub>8</sub> In <sub>2</sub> O <sub>10</sub> )<br>·(2.09 CD <sub>4</sub> ) | 0.5(C <sub>16</sub> H <sub>8</sub> In <sub>2</sub> O <sub>10</sub> )<br>·(3.11 CD <sub>4</sub> ) |
| M <sub>r</sub>             | 294.93                                                               | 316.73                                                                                           | 336.82                                                                                           | 357.21                                                                                           |
| Crystal system             | Tetragonal                                                           | Tetragonal                                                                                       | Tetragonal                                                                                       | Tetragonal                                                                                       |
| Space group                | <i>I</i> 4 <sub>1</sub> 22                                           | <i>I</i> 4 <sub>1</sub> 22                                                                       | <i>I</i> 4 <sub>1</sub> 22                                                                       | <i>I</i> 4 <sub>1</sub> 22                                                                       |
| Temperature                | 7 K                                                                  | 7 K                                                                                              | 7 K                                                                                              | 7 K                                                                                              |
| <i>a</i> (Å)               | 15.49526 (11)                                                        | 15.46363 (5)                                                                                     | 15.43745 (10)                                                                                    | 15.5019 (3)                                                                                      |
| <i>c</i> (Å)               | 12.32020 (17)                                                        | 12.29044 (10)                                                                                    | 12.2848 (2)                                                                                      | 12.3060 (3)                                                                                      |
| <i>V</i> (Å <sup>3</sup> ) | 2958.12 (6)                                                          | 2938.94 (3)                                                                                      | 2927.65 (6)                                                                                      | 2957.24 (14)                                                                                     |
| <i>Z</i>                   | 8                                                                    | 8                                                                                                | 8                                                                                                | 8                                                                                                |
| Sample size (mm)           | Cylinder, 65 x 8                                                     | Cylinder, 65 x 8                                                                                 | Cylinder, 65 x 8                                                                                 | Cylinder, 65 x 8                                                                                 |
| Radiation type             | Neutron                                                              | Neutron                                                                                          | Neutron                                                                                          | Neutron                                                                                          |
| Scan method                | Time of Flight                                                       | Time of Flight                                                                                   | Time of Flight                                                                                   | Time of Flight                                                                                   |
| R <sub>exp</sub>           | 0.754                                                                | 0.826                                                                                            | 0.317                                                                                            | 0.308                                                                                            |
| R <sub>wp</sub>            | 1.426                                                                | 1.560                                                                                            | 1.624                                                                                            | 1.688                                                                                            |
| R <sub>p</sub>             | 1.686                                                                | 1.217                                                                                            | 1.499                                                                                            | 1.625                                                                                            |
| Goof                       | 1.891                                                                | 1.889                                                                                            | 5.115                                                                                            | 5.472                                                                                            |
| CCDC                       | 1043464                                                              | 1043465                                                                                          | 1043466                                                                                          | 1043467                                                                                          |

Table S3 NPD structural refinement parameters of desolvated MFM-300 and at three loadings of CD<sub>4</sub>.

## Tables of Atomic Parameters for Desolvated, D<sub>2</sub> and CD<sub>4</sub> Loaded MFM-300(In)

### 0.5(C<sub>16</sub>H<sub>8</sub>In<sub>2</sub>O<sub>10</sub>)

|    | <i>m</i> | <i>x</i>    | <i>Y</i>   | <i>z</i>    | <i>U<sub>iso</sub></i> |
|----|----------|-------------|------------|-------------|------------------------|
| In | 8        | 0.6859(2)   | 0.3141(2)  | 0.5         | 0.040(2)               |
| O1 | 8        | 0.7573(2)   | 0.25       | 0.625       | 0.0484(9)              |
| O2 | 16       | 0.6126(4)   | 0.3828(4)  | 0.6166(3)   | 0.0484(9)              |
| O3 | 16       | 0.5939(4)   | 0.2931(3)  | 0.7540(4)   | 0.0484(9)              |
| C1 | 16       | 0.5849(3)   | 0.3642(2)  | 0.7084(2)   | 0.0431(6)              |
| C2 | 16       | 0.53782(10) | 0.43117(8) | 0.7675(2)   | 0.0431(6)              |
| C3 | 8        | 0.5         | 0.5        | 0.7105(3)   | 0.0431(6)              |
| C4 | 16       | 0.53782(10) | 0.43117(8) | 0.88155(15) | 0.0431(6)              |
| C5 | 8        | 0.5         | 0.5        | 0.93859(14) | 0.0431(6)              |
| H1 | 8        | 0.8154(5)   | 0.25       | 0.625       | 0.0484(9)              |
| H3 | 8        | 0.5         | 0.5        | 0.6252(4)   | 0.0431(6)              |
| H4 | 16       | 0.5661(2)   | 0.3797(2)  | 0.9242(2)   | 0.0431(6)              |

Table S4 Atomic positions and isotropic displacement parameters for desolvated MFM-300(In).

### 0.5(C<sub>16</sub>H<sub>8</sub>In<sub>2</sub>O<sub>10</sub>)·(0.90 D<sub>2</sub>)

|      | <i>m</i> | <i>x</i>     | <i>Y</i>    | <i>z</i>     | <i>U<sub>iso</sub></i> | Occ. (<1)  |
|------|----------|--------------|-------------|--------------|------------------------|------------|
| In   | 8        | 0.6867 (2)   | 0.3133 (2)  | 0.5          | 0.036 (2)              |            |
| O1   | 8        | 0.7576 (2)   | 0.25        | 0.625        | 0.0466 (8)             |            |
| O2   | 16       | 0.6119 (4)   | 0.3812 (4)  | 0.6165 (3)   | 0.0466 (8)             |            |
| O3   | 16       | 0.5938 (4)   | 0.2924 (3)  | 0.7534 (3)   | 0.0466 (8)             |            |
| C1   | 16       | 0.5840 (3)   | 0.3638 (2)  | 0.7087 (2)   | 0.0419 (6)             |            |
| C2   | 16       | 0.53713 (11) | 0.43092 (8) | 0.76779 (19) | 0.0419 (6)             |            |
| C3   | 8        | 0.5          | 0.5         | 0.7108 (2)   | 0.0419 (6)             |            |
| C4   | 16       | 0.53713 (11) | 0.43092 (8) | 0.88175 (13) | 0.0419 (6)             |            |
| C5   | 8        | 0.5          | 0.5         | 0.93874 (13) | 0.0419 (6)             |            |
| H1   | 8        | 0.8157 (5)   | 0.25        | 0.625        | 0.0466 (8)             |            |
| H3   | 8        | 0.5          | 0.5         | 0.6255 (4)   | 0.0419 (6)             |            |
| H4   | 16       | 0.5649 (2)   | 0.3792 (2)  | 0.9244 (2)   | 0.0419 (6)             |            |
| D2_1 | 16       | 0.4770 (3)   | 0.7462 (9)  | 0.1619 (6)   | 0.210 (5)              | 0.736 (5)  |
| D2_2 | 8        | 0.6579 (12)  | 0.6579 (12) | 0.5          | 0.38 (3)               | 0.346 (18) |

Table S5 Atomic positions and isotropic displacement parameters for MFM-300(In) at a loading of 0.90 D<sub>2</sub> molecules per In



**0.5(C<sub>16</sub>H<sub>8</sub>In<sub>2</sub>O<sub>10</sub>)·(1.60 D<sub>2</sub>)**

|      | <i>m</i> | <i>x</i>     | <i>Y</i>    | <i>z</i>     | <i>U<sub>iso</sub></i> | Occ. (<1)  |
|------|----------|--------------|-------------|--------------|------------------------|------------|
| In   | 8        | 0.6840 (3)   | 0.3160 (3)  | 0.5          | 0.042 (3)              |            |
| O1   | 8        | 0.7604 (3)   | 0.25000     | 0.62500      | 0.0507 (10)            |            |
| O2   | 16       | 0.6125 (5)   | 0.3822 (5)  | 0.6158 (3)   | 0.0507 (10)            |            |
| O3   | 16       | 0.5926 (5)   | 0.2918 (3)  | 0.7540 (4)   | 0.0507 (10)            |            |
| C1   | 16       | 0.5836 (3)   | 0.3644 (3)  | 0.7090 (2)   | 0.0407 (6)             |            |
| C2   | 16       | 0.53747 (13) | 0.43122 (9) | 0.7676 (2)   | 0.0407 (6)             |            |
| C3   | 8        | 0.5          | 0.5         | 0.7107 (3)   | 0.0407 (6)             |            |
| C4   | 16       | 0.53747 (13) | 0.43122 (9) | 0.88142 (15) | 0.0407 (6)             |            |
| C5   | 8        | 0.5          | 0.5         | 0.93833 (14) | 0.0407 (6)             |            |
| H1   | 8        | 0.8185 (6)   | 0.25        | 0.62500      | 0.0507 (10)            |            |
| H3   | 8        | 0.5          | 0.5         | 0.6254 (5)   | 0.0407 (6)             |            |
| H4   | 16       | 0.5655 (3)   | 0.3797 (3)  | 0.9241 (2)   | 0.0407 (6)             |            |
| D2_1 | 16       | 0.4777 (3)   | 0.7505 (8)  | 0.1702 (5)   | 0.238 (5)              | 0.915 (6)  |
| D2_2 | 8        | 0.6314 (5)   | 0.6314 (5)  | 0.5          | 0.380 (14)             | 0.99 (2)   |
| D2_3 | 8        | 0.75         | 0.9157 (13) | 0.875        | 0.210 (18)             | 0.386 (14) |

Table S6 Atomic positions and isotropic displacement parameters for MFM-300(In) at a loading of 1.60 D<sub>2</sub> molecules per In

**0.5(C<sub>16</sub>H<sub>8</sub>In<sub>2</sub>O<sub>10</sub>)·(2.99 D<sub>2</sub>)**

|      | <i>m</i> | <i>x</i>     | <i>Y</i>     | <i>z</i>     | <i>U<sub>iso</sub></i> | Occ. (<1)  |
|------|----------|--------------|--------------|--------------|------------------------|------------|
| In   | 8        | 0.6842 (3)   | 0.3158 (3)   | 0.5          | 0.036 (3)              |            |
| O1   | 8        | 0.7608 (3)   | 0.25         | 0.625        | 0.0514 (11)            |            |
| O2   | 16       | 0.6118 (5)   | 0.3797 (5)   | 0.6166 (4)   | 0.0514 (11)            |            |
| O3   | 16       | 0.5924 (5)   | 0.2934 (3)   | 0.7531 (5)   | 0.0514 (11)            |            |
| C1   | 16       | 0.5846 (4)   | 0.3642 (3)   | 0.7087 (3)   | 0.0376 (8)             |            |
| C2   | 16       | 0.54133 (14) | 0.43280 (12) | 0.7676 (3)   | 0.0376 (8)             |            |
| C3   | 8        | 0.5          | 0.50000      | 0.7103 (3)   | 0.0376 (8)             |            |
| C4   | 16       | 0.54133 (14) | 0.43280 (12) | 0.8823 (2)   | 0.0376 (8)             |            |
| C5   | 8        | 0.5          | 0.5          | 0.93958 (19) | 0.0376 (8)             |            |
| H1   | 8        | 0.8189 (7)   | 0.25         | 0.625        | 0.0514 (11)            |            |
| H3   | 8        | 0.5          | 0.5          | 0.6250 (6)   | 0.0376 (8)             |            |
| H4   | 16       | 0.5721 (3)   | 0.3828 (3)   | 0.9249 (3)   | 0.0376 (8)             |            |
| D2_1 | 16       | 0.4704 (4)   | 0.7560 (6)   | 0.1852 (6)   | 0.176 (5)              | 0.920 (10) |
| D2_2 | 8        | 0.6186 (5)   | 0.6186 (5)   | 0.5          | 0.380 (11)             | 1.44 (2)   |
| D2_3 | 8        | 0.75         | 0.9057 (9)   | 0.875        | 0.367 (15)             | 1.09 (3)   |
| D2_4 | 16       | 0.7350 (7)   | 0.5640 (6)   | 0.7024 (10)  | 0.277 (10)             | 0.804 (17) |

Table S7 Atomic positions and isotropic displacement parameters for MFM-300(In) at a loading of 2.99 D<sub>2</sub> molecules per In

**0.5(C<sub>16</sub>H<sub>8</sub>In<sub>2</sub>O<sub>10</sub>)·(4.83 D<sub>2</sub>)**

|      | <i>m</i> | <i>x</i>     | <i>Y</i>     | <i>z</i>    | <i>U</i> <sub>iso</sub> | Occ. (<1)  |
|------|----------|--------------|--------------|-------------|-------------------------|------------|
| In   | 8        | 0.6833 (4)   | 0.3167 (4)   | 0.5         | 0.028 (3)               |            |
| O1   | 8        | 0.7549 (5)   | 0.25         | 0.625       | 0.0502 (13)             |            |
| O2   | 16       | 0.6115 (6)   | 0.3793 (6)   | 0.6153 (5)  | 0.0502 (13)             |            |
| O3   | 16       | 0.5933 (6)   | 0.2922 (4)   | 0.7550 (6)  | 0.0502 (13)             |            |
| C1   | 16       | 0.5848 (5)   | 0.3637 (3)   | 0.7092 (4)  | 0.0322 (9)              |            |
| C2   | 16       | 0.54161 (17) | 0.43240 (14) | 0.7681 (3)  | 0.0322 (9)              |            |
| C3   | 8        | 0.5          | 0.5          | 0.7104 (4)  | 0.0322 (9)              |            |
| C4   | 16       | 0.54161 (17) | 0.43240 (14) | 0.8835 (2)  | 0.0322 (9)              |            |
| C5   | 8        | 0.5          | 0.5          | 0.9412 (2)  | 0.0322 (9)              |            |
| H1   | 8        | 0.8130 (10)  | 0.25         | 0.625       | 0.0502 (13)             |            |
| H3   | 8        | 0.5          | 0.5          | 0.6273 (6)  | 0.0322 (9)              |            |
| H4   | 16       | 0.5716 (3)   | 0.3837 (3)   | 0.9250 (3)  | 0.0322 (9)              |            |
| D2_1 | 16       | 0.4652 (5)   | 0.7581 (5)   | 0.1962 (6)  | 0.222 (6)               | 1.230 (15) |
| D2_2 | 8        | 0.6173 (8)   | 0.6173 (8)   | 0.5         | 0.380 (19)              | 1.00 (3)   |
| D2_3 | 8        | 0.75         | 0.9103 (8)   | 0.875       | 0.313 (13)              | 1.52 (3)   |
| D2_4 | 16       | 0.7228 (8)   | 0.5569 (8)   | 0.6794 (10) | 0.262 (10)              | 1.23 (3)   |
| D2_5 | 16       | 0.6743 (12)  | 0.8598 (15)  | 0.1771 (10) | 0.314 (15)              | 0.755 (18) |
| D2_6 | 16       | 0.7017 (14)  | 0.5759 (14)  | 0.814 (2)   | 0.142 (14)              | 0.36 (2)   |

Table S8 Atomic positions and isotropic displacement parameters for MFM-300(In) at a loading of 4.83 D<sub>2</sub> molecules per In

**0.5(C<sub>16</sub>H<sub>8</sub>In<sub>2</sub>O<sub>10</sub>)·(6.08 D<sub>2</sub>)**

|      | <i>m</i> | <i>x</i>    | <i>Y</i>     | <i>z</i>    | <i>U</i> <sub>iso</sub> | Occ. (<1)  |
|------|----------|-------------|--------------|-------------|-------------------------|------------|
| In   | 8        | 0.6805 (5)  | 0.3195 (5)   | 0.5         | 0.022 (4)               |            |
| O1   | 8        | 0.7557 (6)  | 0.25000      | 0.625       | 0.0612 (19)             |            |
| O2   | 16       | 0.6082 (8)  | 0.3773 (8)   | 0.6167 (6)  | 0.0612 (19)             |            |
| O3   | 16       | 0.5918 (9)  | 0.2924 (5)   | 0.7553 (8)  | 0.0612 (19)             |            |
| C1   | 16       | 0.5828 (6)  | 0.3626 (4)   | 0.7098 (5)  | 0.0332 (10)             |            |
| C2   | 16       | 0.5400 (2)  | 0.43149 (18) | 0.7687 (4)  | 0.0332 (10)             |            |
| C3   | 8        | 0.5         | 0.5          | 0.7110 (5)  | 0.0332 (10)             |            |
| C4   | 16       | 0.5400 (2)  | 0.43149 (18) | 0.8841 (3)  | 0.0332 (10)             |            |
| C5   | 8        | 0.5         | 0.5          | 0.9418 (3)  | 0.0332 (10)             |            |
| H1   | 8        | 0.8138 (12) | 0.25         | 0.625       | 0.0612 (19)             |            |
| H3   | 8        | 0.5         | 0.5          | 0.6299 (8)  | 0.0332 (10)             |            |
| H4   | 16       | 0.5681 (4)  | 0.3833 (5)   | 0.9246 (4)  | 0.0332 (10)             |            |
| D2_1 | 16       | 0.4589 (5)  | 0.7586 (7)   | 0.2017 (8)  | 0.210 (6)               | 1.274 (19) |
| D2_2 | 8        | 0.6118 (8)  | 0.6118 (8)   | 0.5         | 0.380 (19)              | 1.24 (3)   |
| D2_3 | 8        | 0.75        | 0.9163 (12)  | 0.875       | 0.346 (14)              | 2.00 (6)   |
| D2_4 | 16       | 0.7211 (7)  | 0.5477 (6)   | 0.6946 (9)  | 0.252 (10)              | 1.40 (3)   |
| D2_5 | 16       | 0.6829 (11) | 0.8685 (12)  | 0.1532 (12) | 0.284 (14)              | 1.09 (3)   |
| D2_6 | 16       | 0.6778 (10) | 0.6174 (9)   | 0.8286 (14) | 0.074 (10)              | 0.45 (2)   |
| D2_7 | 16       | 0.681 (7)   | 0.693 (6)    | 0.699 (6)   | 0.380 (19)              | 0.25 (2)   |

Table S9 Atomic positions and isotropic displacement parameters for MFM-300(In) at a loading of 6.08 D<sub>2</sub> molecules per In

**0.5(C<sub>16</sub>H<sub>8</sub>In<sub>2</sub>O<sub>10</sub>)·(1.09 CD<sub>4</sub>)**

|      | <i>m</i> | <i>x</i>    | <i>Y</i>    | <i>z</i>    | <i>U</i> <sub>iso</sub> | Occ. (<1) |
|------|----------|-------------|-------------|-------------|-------------------------|-----------|
| In   | 8        | 0.6875(4)   | 0.3125(4)   | 0.5         | 0.085(5)                |           |
| O1   | 8        | 0.7617(3)   | 0.25        | 0.625       | 0.075(2)                |           |
| O2   | 16       | 0.6139(6)   | 0.3806(7)   | 0.6160(4)   | 0.075(2)                |           |
| O3   | 16       | 0.5938(7)   | 0.2910(4)   | 0.7512(5)   | 0.075(2)                |           |
| C1   | 16       | 0.5837(5)   | 0.3644(4)   | 0.7088(3)   | 0.0779(14)              |           |
| C2   | 16       | 0.53685(17) | 0.43088(11) | 0.7674(2)   | 0.0779(14)              |           |
| C3   | 8        | 0.5         | 0.5         | 0.7106(3)   | 0.0779(14)              |           |
| C4   | 16       | 0.53685(17) | 0.43088(11) | 0.88125(16) | 0.0779(14)              |           |
| C5   | 8        | 0.5         | 0.5         | 0.93814(15) | 0.0779(14)              |           |
| H1   | 8        | 0.8199(8)   | 0.25        | 0.625       | 0.075(2)                |           |
| H3   | 8        | 0.5         | 0.5         | 0.6251(6)   | 0.0779(14)              |           |
| H4   | 16       | 0.5645(4)   | 0.3790(4)   | 0.9240(3)   | 0.0779(14)              |           |
| C1_1 | 16       | 0.5127(2)   | 0.7333(8)   | 0.1360(7)   | 0.190(6)                | 0.398(2)  |
| D1_1 | 16       | 0.552(3)    | 0.783(2)    | 0.1642(15)  | 0.228(9)                | 0.398(2)  |
| D2_1 | 16       | 0.5034(8)   | 0.7402(15)  | 0.0522(10)  | 0.228(9)                | 0.398(2)  |
| D3_1 | 16       | 0.4530(8)   | 0.736(3)    | 0.1756(14)  | 0.228(9)                | 0.398(2)  |
| D4_1 | 16       | 0.542(3)    | 0.6737(19)  | 0.1519(15)  | 0.228(9)                | 0.398(2)  |
| C1_2 | 8        | 0.6399(5)   | 0.6399(5)   | 0.5         | 0.190(6)                | 0.292(6)  |
| D1_2 | 16       | 0.663(3)    | 0.649(4)    | 0.578(2)    | 0.228(9)                | 0.146(2)  |
| D4_2 | 16       | 0.648(2)    | 0.696(2)    | 0.456(4)    | 0.228(9)                | 0.146(2)  |
| D2_2 | 16       | 0.5753(16)  | 0.624(2)    | 0.503(4)    | 0.228(9)                | 0.146(2)  |
| D3_2 | 16       | 0.674(3)    | 0.5906(18)  | 0.464(4)    | 0.228(9)                | 0.146(2)  |

Table S10 Atomic positions and isotropic displacement parameters for MFM-300(In) at a loading of 1.09 CD<sub>4</sub> molecules per In.

**0.5(C<sub>16</sub>H<sub>8</sub>In<sub>2</sub>O<sub>10</sub>)·(2.09 CD<sub>4</sub>)**

|      | <i>m</i> | <i>x</i>    | <i>Y</i>    | <i>z</i>   | <i>U</i> <sub>iso</sub> | Occ. (<1) |
|------|----------|-------------|-------------|------------|-------------------------|-----------|
| In   | 8        | 0.6837(4)   | 0.3163(4)   | 0.5        | 0.058(3)                |           |
| O1   | 8        | 0.7580(4)   | 0.25        | 0.625      | 0.0602(13)              |           |
| O2   | 16       | 0.6140(6)   | 0.3806(7)   | 0.6173(5)  | 0.0602(13)              |           |
| O3   | 16       | 0.5910(7)   | 0.2909(4)   | 0.7508(6)  | 0.0602(13)              |           |
| C1   | 16       | 0.5833(5)   | 0.3637(4)   | 0.7085(4)  | 0.0578(9)               |           |
| C2   | 16       | 0.53734(17) | 0.43096(13) | 0.7673(3)  | 0.0578(9)               |           |
| C3   | 8        | 0.5         | 0.5         | 0.7104(4)  | 0.0578(9)               |           |
| C4   | 16       | 0.53734(17) | 0.43096(13) | 0.8812(2)  | 0.0578(9)               |           |
| C5   | 8        | 0.5         | 0.5         | 0.9381(2)  | 0.0578(9)               |           |
| H1   | 8        | 0.8163(8)   | 0.25        | 0.625      | 0.0602(13)              |           |
| H3   | 8        | 0.5         | 0.5         | 0.6249(7)  | 0.0578(9)               |           |
| H4   | 16       | 0.5654(4)   | 0.3792(4)   | 0.9239(4)  | 0.0578(9)               |           |
| C1_1 | 16       | 0.5197(3)   | 0.7430(5)   | 0.1781(4)  | 0.129(4)                | 0.463(4)  |
| D1_1 | 16       | 0.5306(8)   | 0.7466(9)   | 0.2607(6)  | 0.155(4)                | 0.463(4)  |
| D2_1 | 16       | 0.5567(8)   | 0.7890(8)   | 0.1390(10) | 0.155(4)                | 0.463(4)  |
| D3_1 | 16       | 0.4552(5)   | 0.7542(10)  | 0.1624(10) | 0.155(4)                | 0.463(4)  |
| D4_1 | 16       | 0.5365(9)   | 0.6823(7)   | 0.1505(10) | 0.155(4)                | 0.463(4)  |
| C1_2 | 8        | 0.6349(3)   | 0.6349(3)   | 0.5        | 0.129(4)                | 0.596(6)  |
| D1_2 | 16       | 0.640(2)    | 0.5775(8)   | 0.5421(14) | 0.155(4)                | 0.298(3)  |
| D2_2 | 16       | 0.5704(8)   | 0.650(3)    | 0.4892(17) | 0.155(4)                | 0.298(3)  |
| D3_2 | 16       | 0.6644(13)  | 0.6287(16)  | 0.4252(10) | 0.155(4)                | 0.298(3)  |
| D4_2 | 16       | 0.665(2)    | 0.6836(14)  | 0.5435(14) | 0.155(4)                | 0.298(3)  |
| C1_3 | 16       | 0.6078(5)   | 0.7379(5)   | 0.3633(7)  | 0.129(4)                | 0.284(4)  |
| D1_3 | 16       | 0.642(2)    | 0.6844(17)  | 0.3368(17) | 0.155(4)                | 0.284(4)  |
| D2_3 | 16       | 0.6402(15)  | 0.7659(13)  | 0.4275(14) | 0.155(4)                | 0.284(4)  |
| D3_3 | 16       | 0.5469(12)  | 0.719(3)    | 0.3881(17) | 0.155(4)                | 0.284(4)  |
| D4_3 | 16       | 0.603(2)    | 0.7819(12)  | 0.3006(15) | 0.155(4)                | 0.284(4)  |

Table S11 Atomic positions and isotropic displacement parameters for MFM-300(In) at a loading of 2.09 CD<sub>4</sub> molecules per In.

**0.5(C<sub>16</sub>H<sub>8</sub>In<sub>2</sub>O<sub>10</sub>)·(3.11 CD<sub>4</sub>)**

|      | <i>m</i> | <i>x</i>   | <i>y</i>    | <i>z</i>   | <i>U</i> <sub>iso</sub> | Occ. (<1) |
|------|----------|------------|-------------|------------|-------------------------|-----------|
| In   | 8        | 0.6719(8)  | 0.3281(8)   | 0.5        | 0.139(8)                |           |
| O1   | 8        | 0.7575(6)  | 0.25        | 0.625      | 0.085(2)                |           |
| O2   | 16       | 0.6135(9)  | 0.3817(9)   | 0.6182(6)  | 0.085(2)                |           |
| O3   | 16       | 0.5881(10) | 0.2912(6)   | 0.7545(8)  | 0.085(2)                |           |
| C1   | 16       | 0.5829(7)  | 0.3643(5)   | 0.7104(5)  | 0.0561(11)              |           |
| C2   | 16       | 0.5391(2)  | 0.43248(18) | 0.7693(4)  | 0.0561(11)              |           |
| C3   | 8        | 0.5        | 0.5         | 0.7126(5)  | 0.0561(11)              |           |
| C4   | 16       | 0.5391(2)  | 0.43248(18) | 0.8828(3)  | 0.0561(11)              |           |
| C5   | 8        | 0.5        | 0.5         | 0.9395(2)  | 0.0561(11)              |           |
| H1   | 8        | 0.8155(13) | 0.25        | 0.625      | 0.085(2)                |           |
| H3   | 8        | 0.5        | 0.5         | 0.6273(10) | 0.0561(11)              |           |
| H4   | 16       | 0.5684(5)  | 0.3817(6)   | 0.9254(5)  | 0.0561(11)              |           |
| C1_1 | 16       | 0.5148(7)  | 0.7382(6)   | 0.2037(6)  | 0.179(5)                | 0.504(6)  |
| D1_1 | 16       | 0.5496(14) | 0.7939(11)  | 0.185(2)   | 0.214(5)                | 0.504(6)  |
| D2_1 | 16       | 0.4492(9)  | 0.7491(14)  | 0.1898(16) | 0.214(5)                | 0.504(6)  |
| D3_1 | 16       | 0.5244(14) | 0.7224(15)  | 0.2853(10) | 0.214(5)                | 0.504(6)  |
| D4_1 | 16       | 0.5359(15) | 0.6874(13)  | 0.1547(15) | 0.214(5)                | 0.504(6)  |
| C1_2 | 8        | 0.6389(5)  | 0.6389(5)   | 0.5        | 0.179(5)                | 0.582(10) |
| D1_2 | 16       | 0.634(9)   | 0.5779(19)  | 0.536(3)   | 0.214(5)                | 0.291(4)  |
| D2_2 | 16       | 0.619(3)   | 0.635(3)    | 0.4189(16) | 0.214(5)                | 0.291(4)  |
| D3_2 | 16       | 0.703(3)   | 0.660(9)    | 0.504(3)   | 0.214(5)                | 0.291(4)  |
| D4_2 | 16       | 0.599(5)   | 0.682(6)    | 0.542(4)   | 0.214(5)                | 0.291(4)  |
| C1_3 | 16       | 0.6239(6)  | 0.7689(6)   | 0.3117(8)  | 0.179(5)                | 0.478(6)  |
| D1_3 | 16       | 0.6103(14) | 0.7912(13)  | 0.3894(13) | 0.214(5)                | 0.478(6)  |
| D2_3 | 16       | 0.5678(11) | 0.7453(14)  | 0.2764(17) | 0.214(5)                | 0.478(6)  |
| D3_3 | 16       | 0.6695(13) | 0.7200(12)  | 0.3161(17) | 0.214(5)                | 0.478(6)  |
| D4_3 | 16       | 0.6479(14) | 0.8193(12)  | 0.2650(16) | 0.214(5)                | 0.478(6)  |
| C1_4 | 8        | 0.75       | 0.8979(9)   | 0.875      | 0.179(5)                | 0.564(14) |
| D1_4 | 16       | 0.710(5)   | 0.937(5)    | 0.830(4)   | 0.214(5)                | 0.282(6)  |
| D2_4 | 16       | 0.778(4)   | 0.934(5)    | 0.936(5)   | 0.214(5)                | 0.282(6)  |
| D3_4 | 16       | 0.798(3)   | 0.873(6)    | 0.826(3)   | 0.214(5)                | 0.282(6)  |
| D4_4 | 16       | 0.715(6)   | 0.848(4)    | 0.908(6)   | 0.214(5)                | 0.282(6)  |

Table S12 Atomic positions and isotropic displacement parameters for MFM-300(In) at a loading of 3.11 CD<sub>4</sub> molecules per In.

## Refined Neutron Profiles

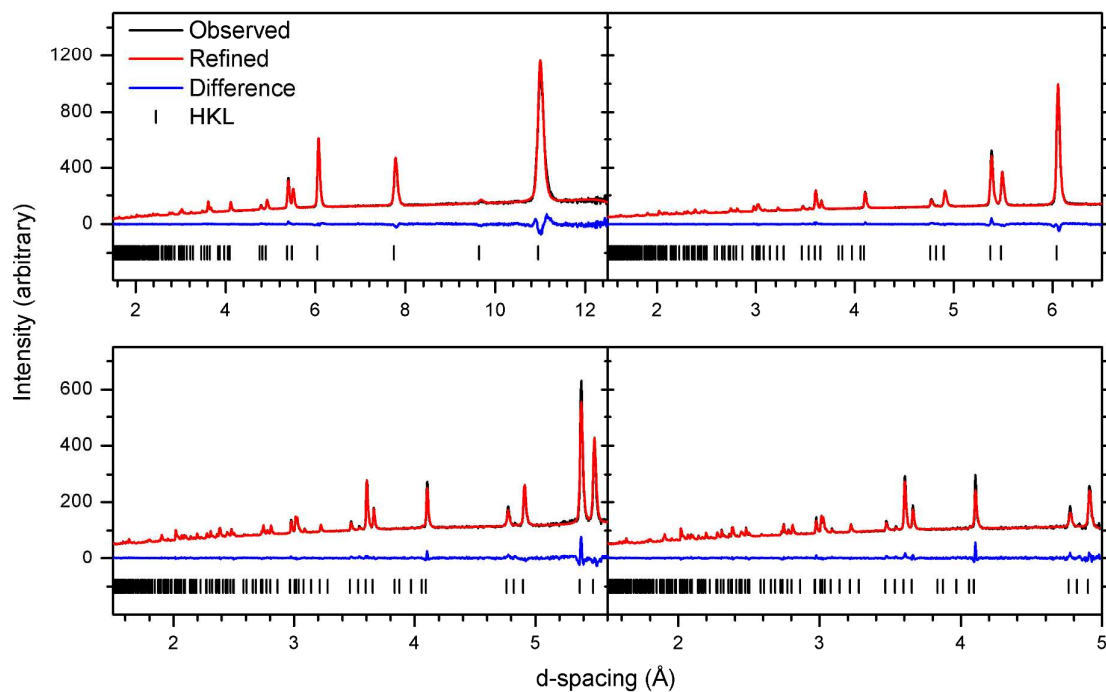

Figure S22 Observed (black), calculated (red) and difference (blue) neutron powder diffraction profiles of four of the detector banks of the WISH diffractometer for activated MFM-300(In). Each bank has a different resolution. The refinement was carried out by combining all four banks of detectors.

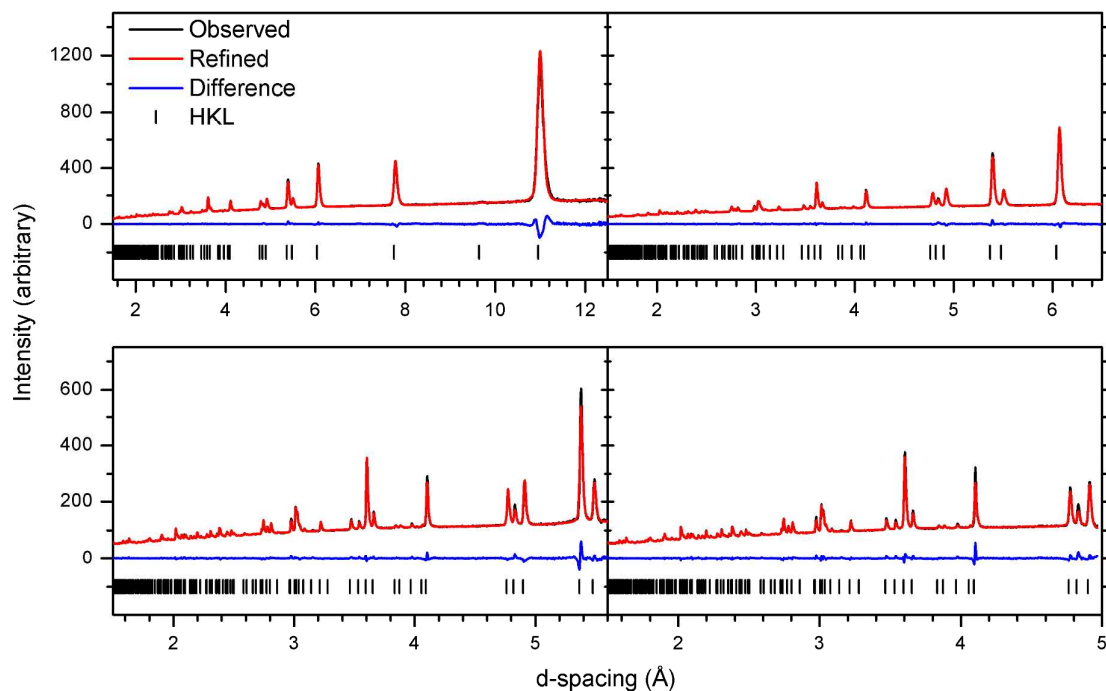

Figure S23 Observed (black), calculated (red) and difference (blue) neutron powder diffraction profiles of four of the detector banks of the WISH diffractometer for MFM-300(In) with a loading of 0.90 D<sub>2</sub> molecules per In. Each bank has a different resolution. The refinement was carried out by combining all four banks of detectors.

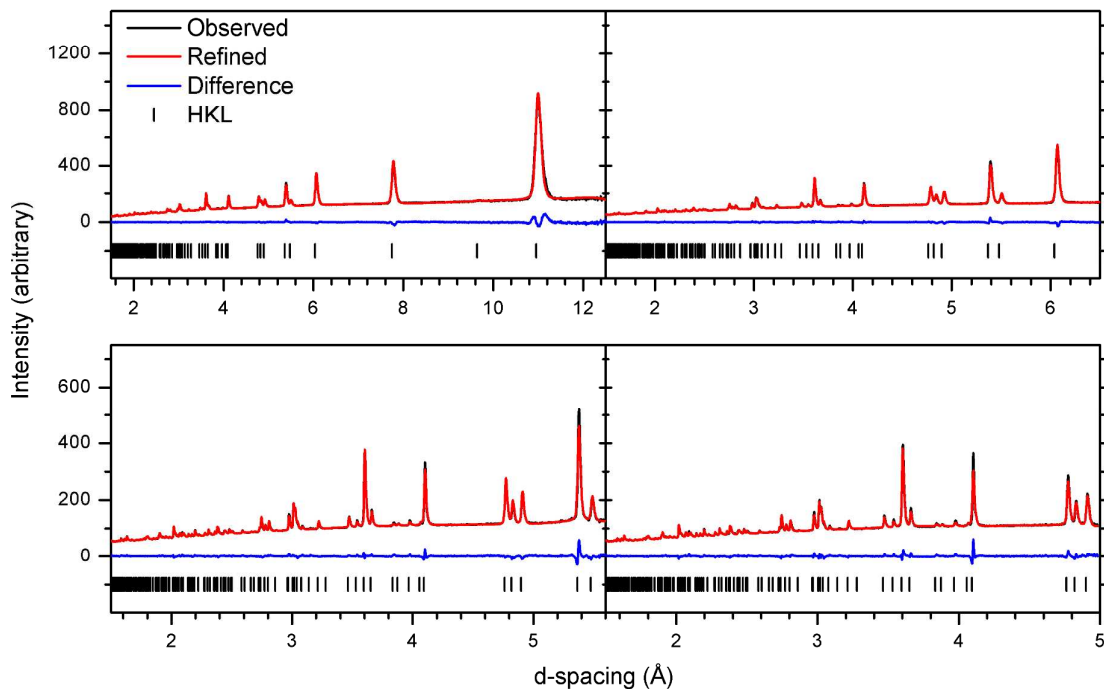

Figure S24 Observed (black), calculated (red) and difference (blue) neutron powder diffraction profiles of four of the detector banks of the WISH diffractometer for MFM-300(In) with a loading of 1.60 D<sub>2</sub> molecules per In. Each bank has a different resolution. The refinement was carried out by combining all four banks of detectors.

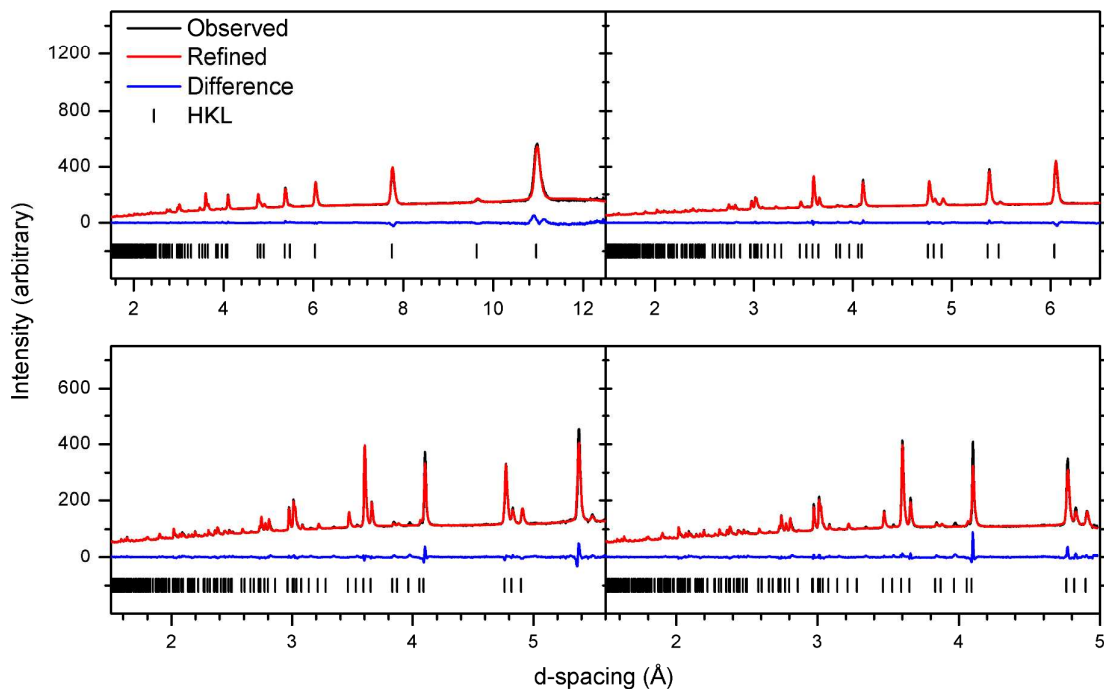

Figure S25 Observed (black), calculated (red) and difference (blue) neutron powder diffraction profiles of four of the detector banks of the WISH diffractometer for MFM-300(In) with a loading of 2.99 D<sub>2</sub> molecules per In. Each bank has a different resolution. The refinement was carried out by combining all four banks of detectors.



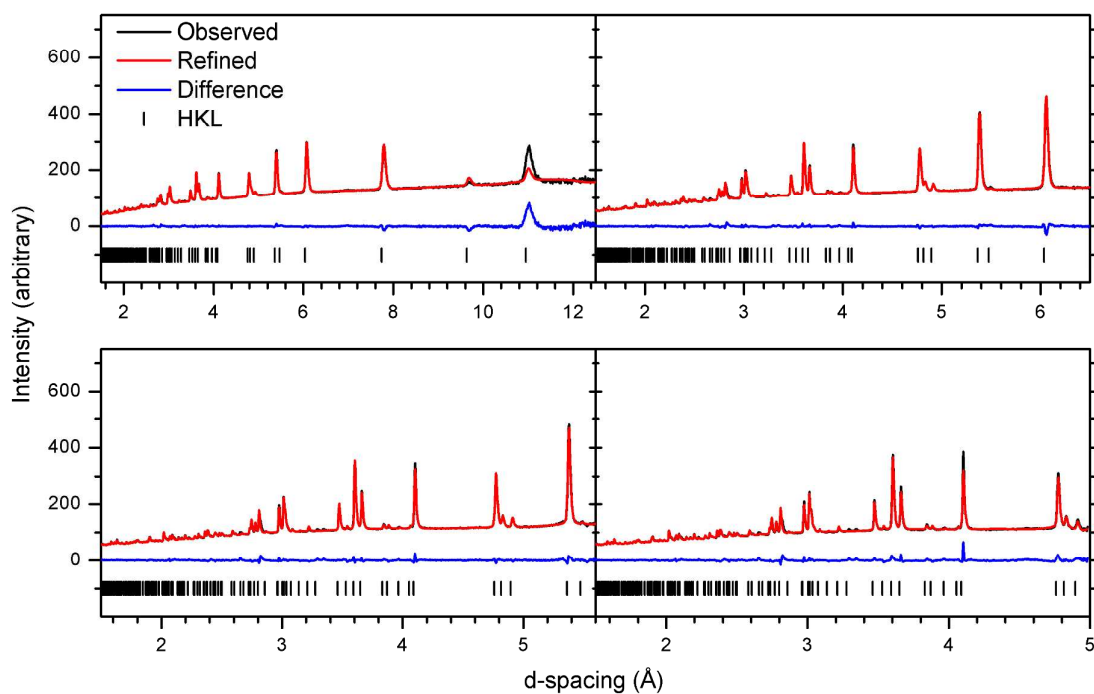

Figure S26 Observed (black), calculated (red) and difference (blue) neutron powder diffraction profiles of four of the detector banks of the WISH diffractometer for MFM-300(In) with a loading of 4.83 D<sub>2</sub> molecules per In. Each bank has a different resolution. The refinement was carried out by combining all four banks of detectors.

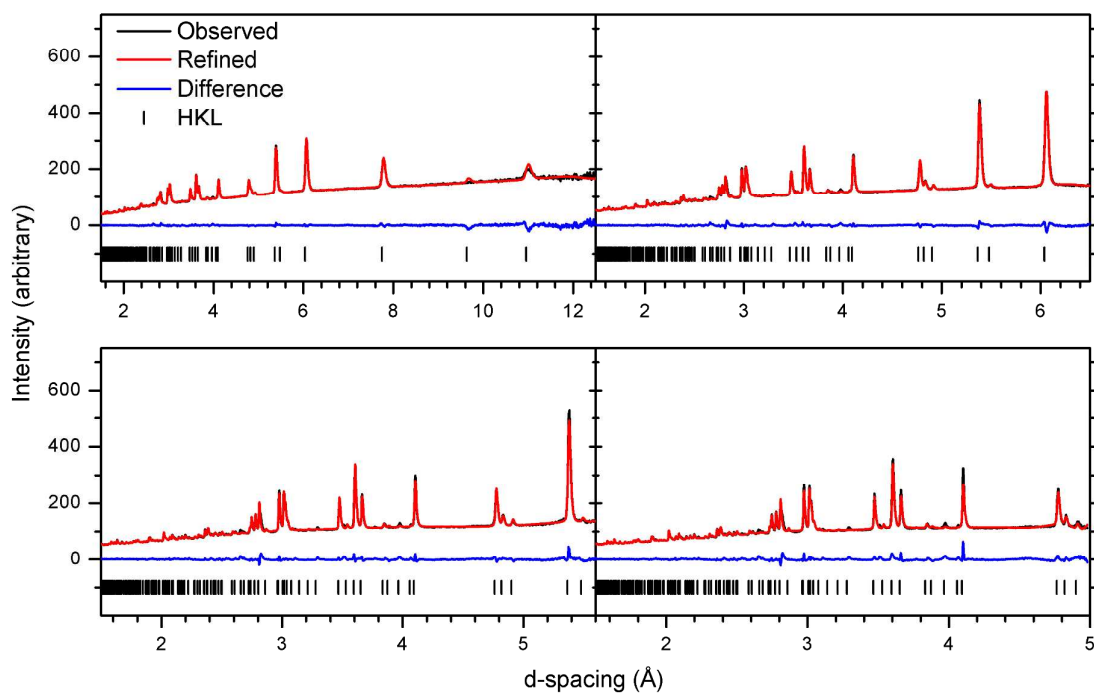

Figure S27 Observed (black), calculated (red) and difference (blue) neutron powder diffraction profiles of four of the detector banks of the WISH diffractometer for MFM-300(In) with a loading of 6.08 D<sub>2</sub> molecules per In. Each bank has a different resolution. The refinement was carried out by combining all four banks of detectors.

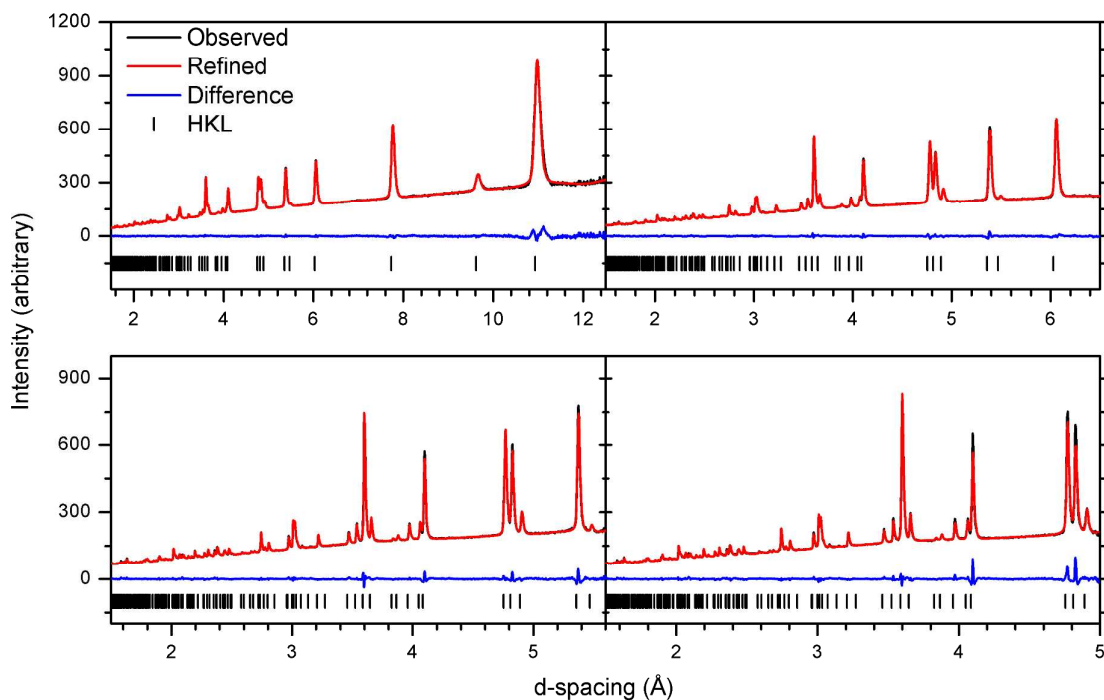

Figure S28 Observed (black), calculated (red) and difference (blue) neutron powder diffraction profiles of four of the detector banks of the WISH diffractometer for MFM-300(In) with a loading of 1.09 CD<sub>4</sub> molecules per In. Each bank has a different resolution. The refinement was carried out by combining all four banks of detectors.

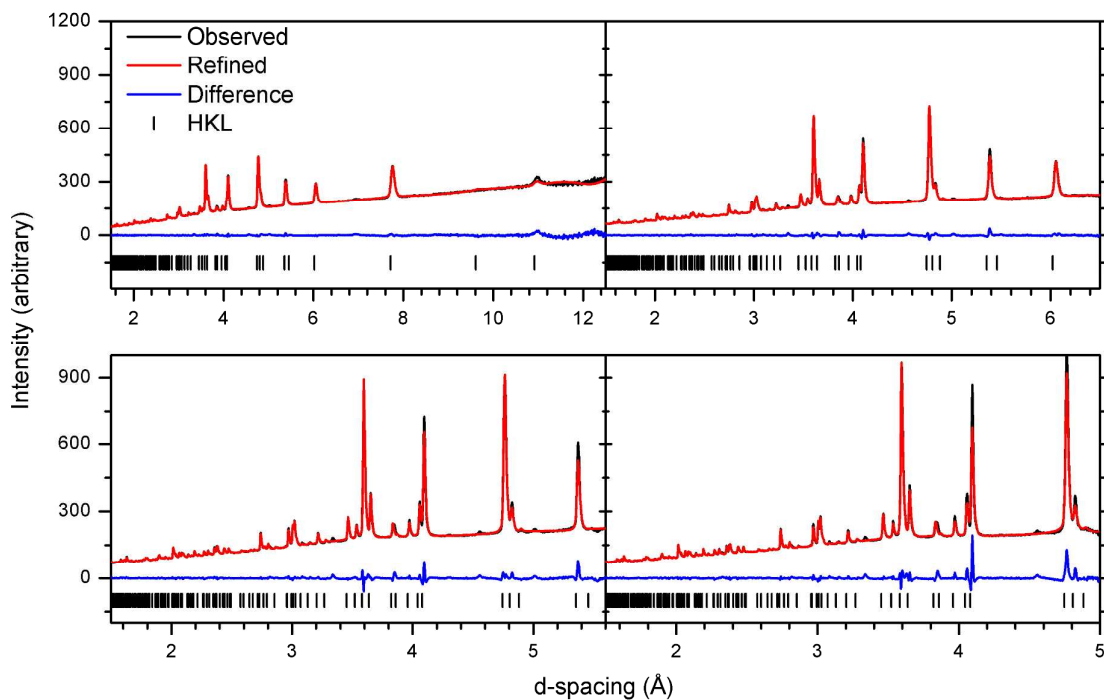

Figure S29 Observed (black), calculated (red) and difference (blue) neutron powder diffraction profiles of four of the detector banks of the WISH diffractometer for MFM-300(In) with a loading of 2.09 CD<sub>4</sub> molecules per In. Each bank has a different resolution. The refinement was carried out by combining all four banks of detectors.

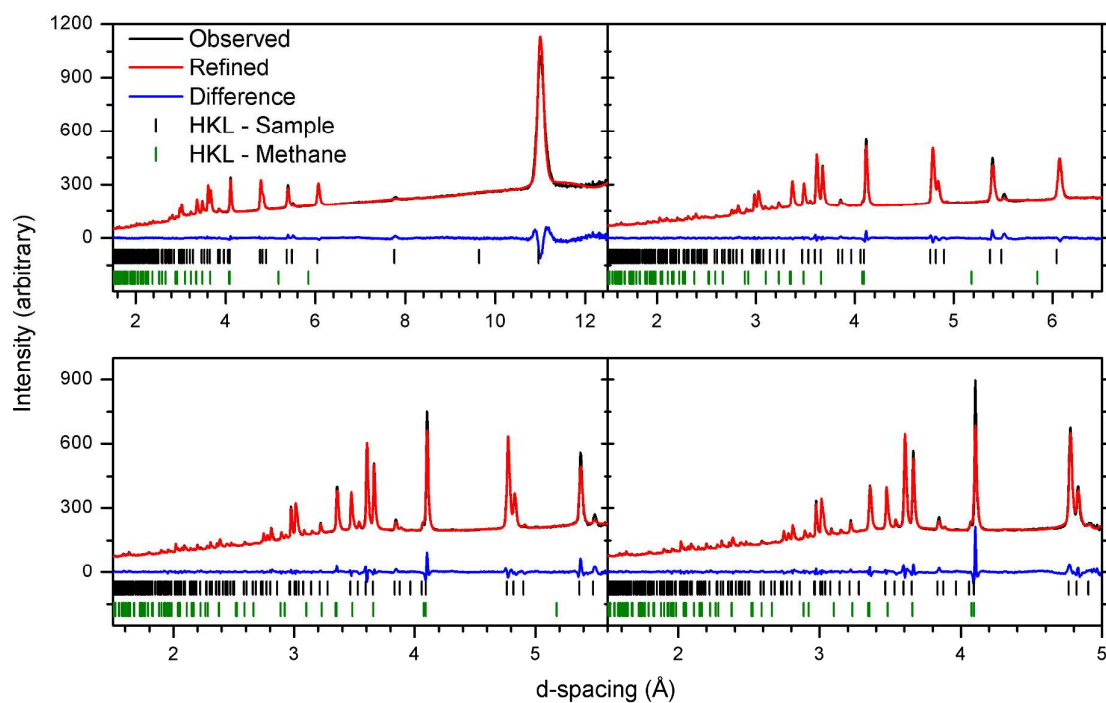

Figure S30 Observed (black), calculated (red) and difference (blue) neutron powder diffraction profiles of four of the detector banks of the WISH diffractometer for MFM-300(In) with a loading of 3.11 CD<sub>4</sub> molecules per In. A small amount of condensed methane (3.42%) is present at this saturated loading according to the refinement.

## Fourier Difference Map

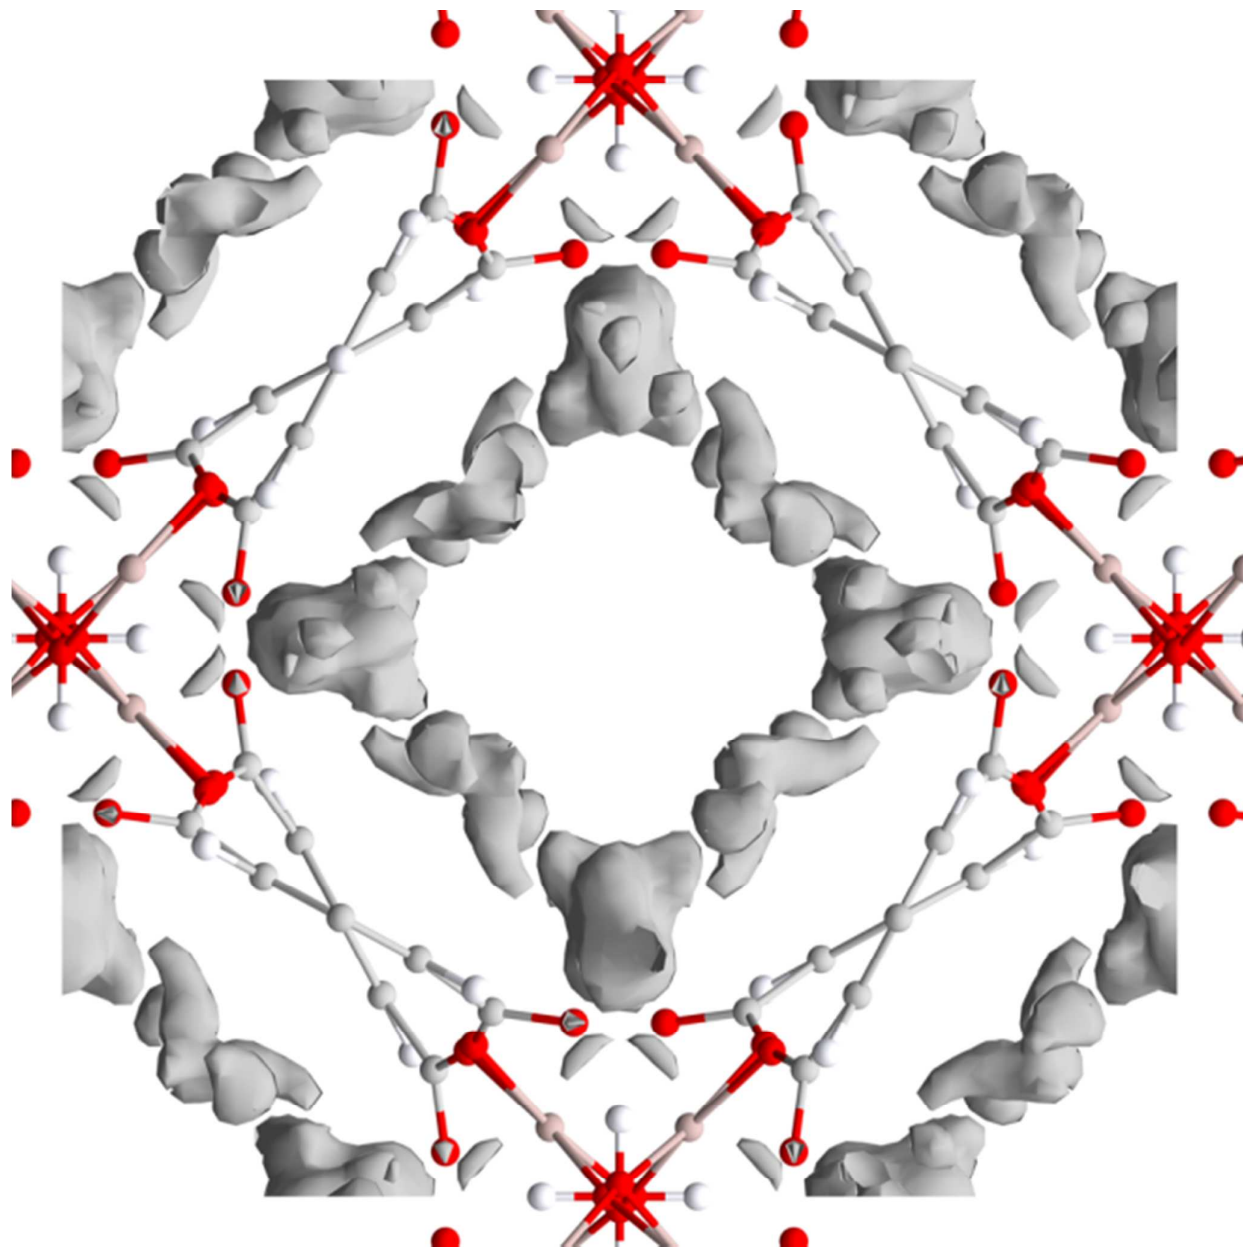

Figure S31 Fourier difference map of the residual nuclear density of MFM-300(In) at a loading of 1.09 CD<sub>4</sub> per In revealing the two different adsorption sites.

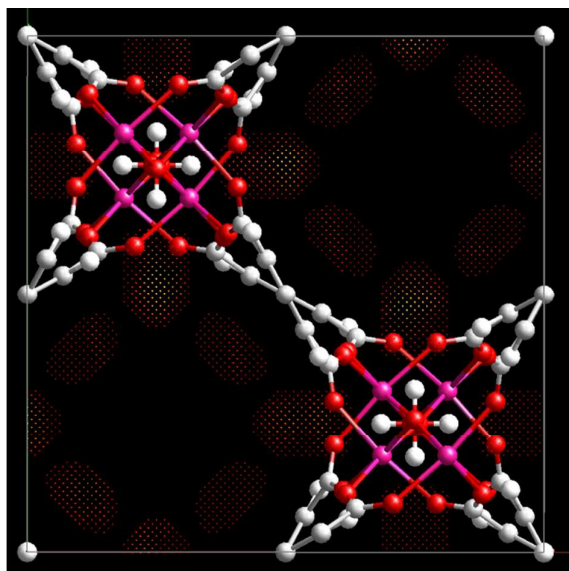

Figure S32 Fourier difference map of the residual nuclear density peaks of MFM-300(In) at a loading of 0.90  $D_2$  per In revealing the two different adsorption sites.

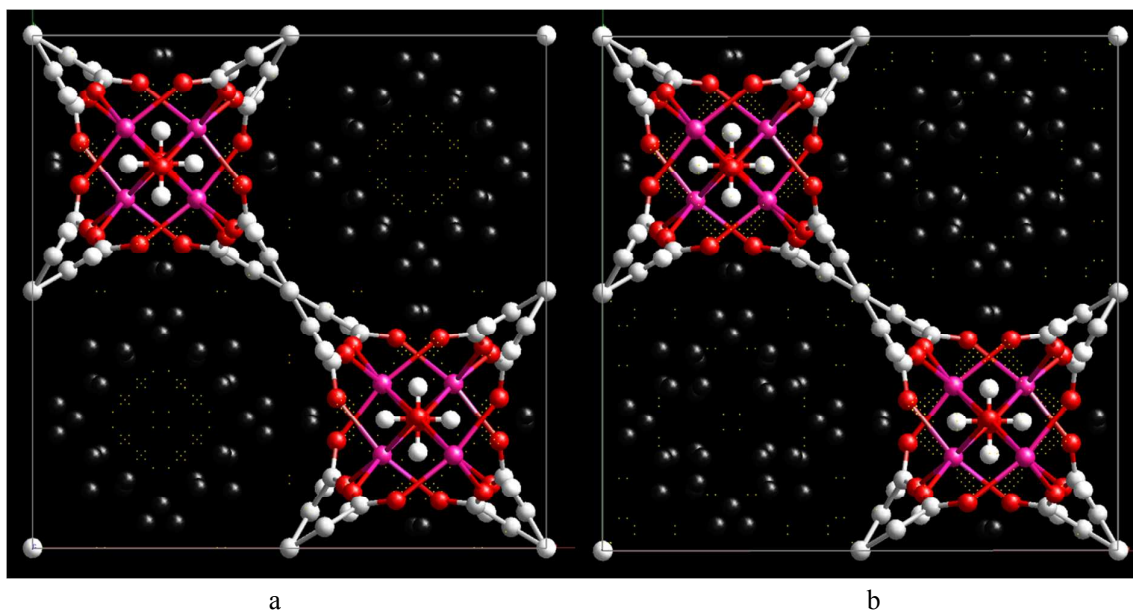

Figure S33 Comparison of the Fourier difference maps of the residual nuclear density of MFM-300(In) at a loading of  $6.08D_2$  per In (a) without Site VII in the model and (b) with Site VII in the model. Clear residual density peaks were seen in (a), demonstrating the significance of including the additional binding site VII. In contrast, no significant residual density peak was found in (b), indicating the satisfactory refinement model by including all the significant binding sites.

## Additional Crystal Structure Views of the Gas Loaded Material

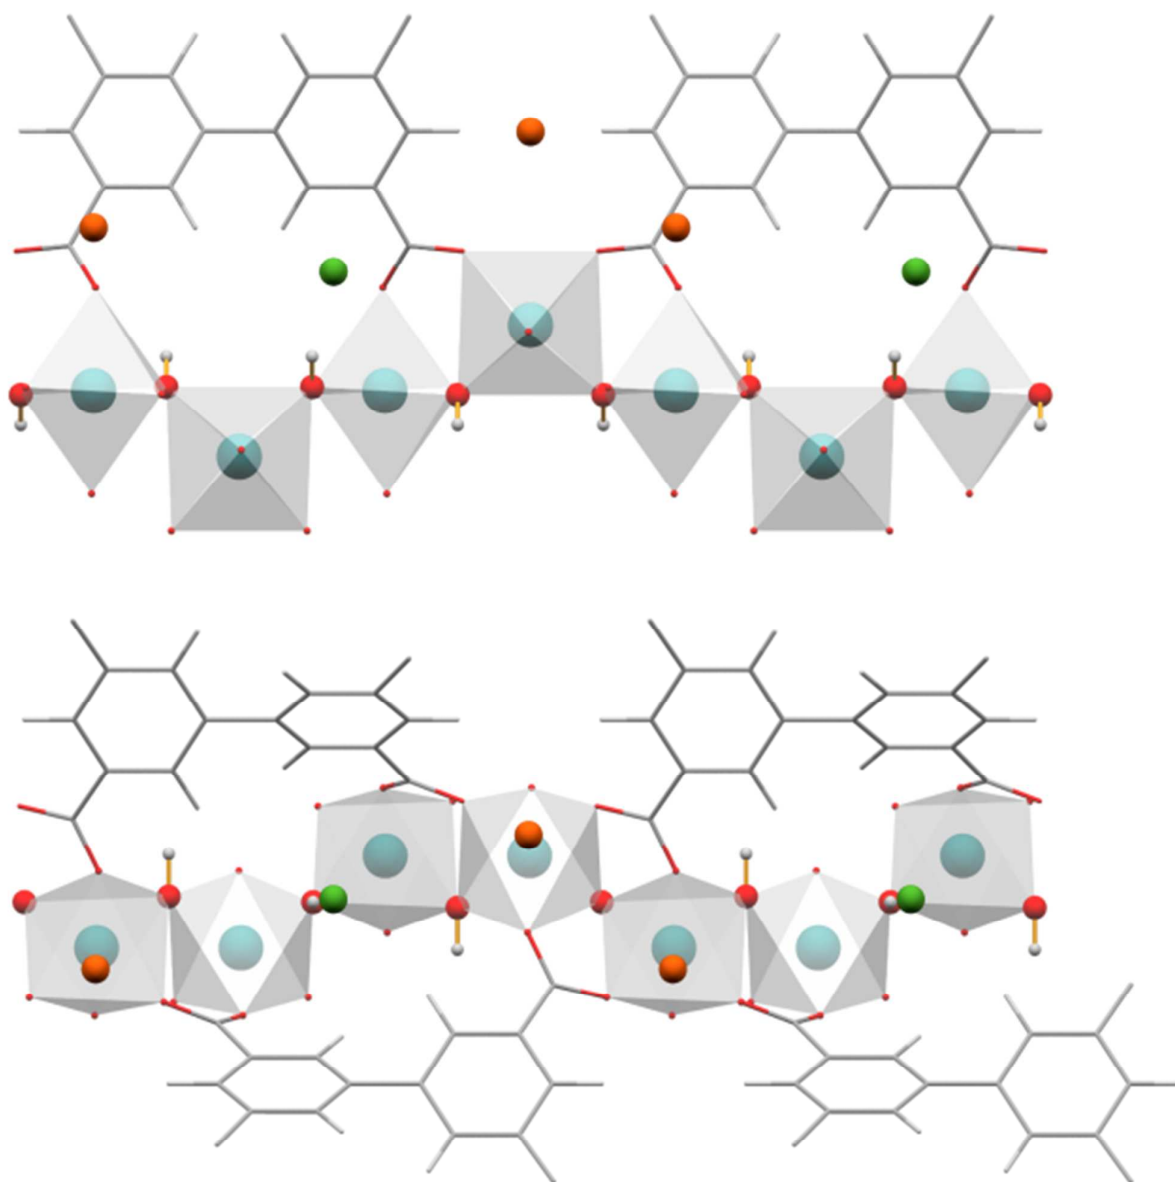

Figure S34 Two views of the *c* crystallographic axis of MFM-300(In) at a gas loading of 0.90 D<sub>2</sub> per In ([In<sub>2</sub>(OH)<sub>2</sub>(C<sub>16</sub>H<sub>6</sub>O<sub>8</sub>)]·1.80 D<sub>2</sub>), highlighting the CD<sub>4</sub> binding sites (Site I, green; Site II, orange).

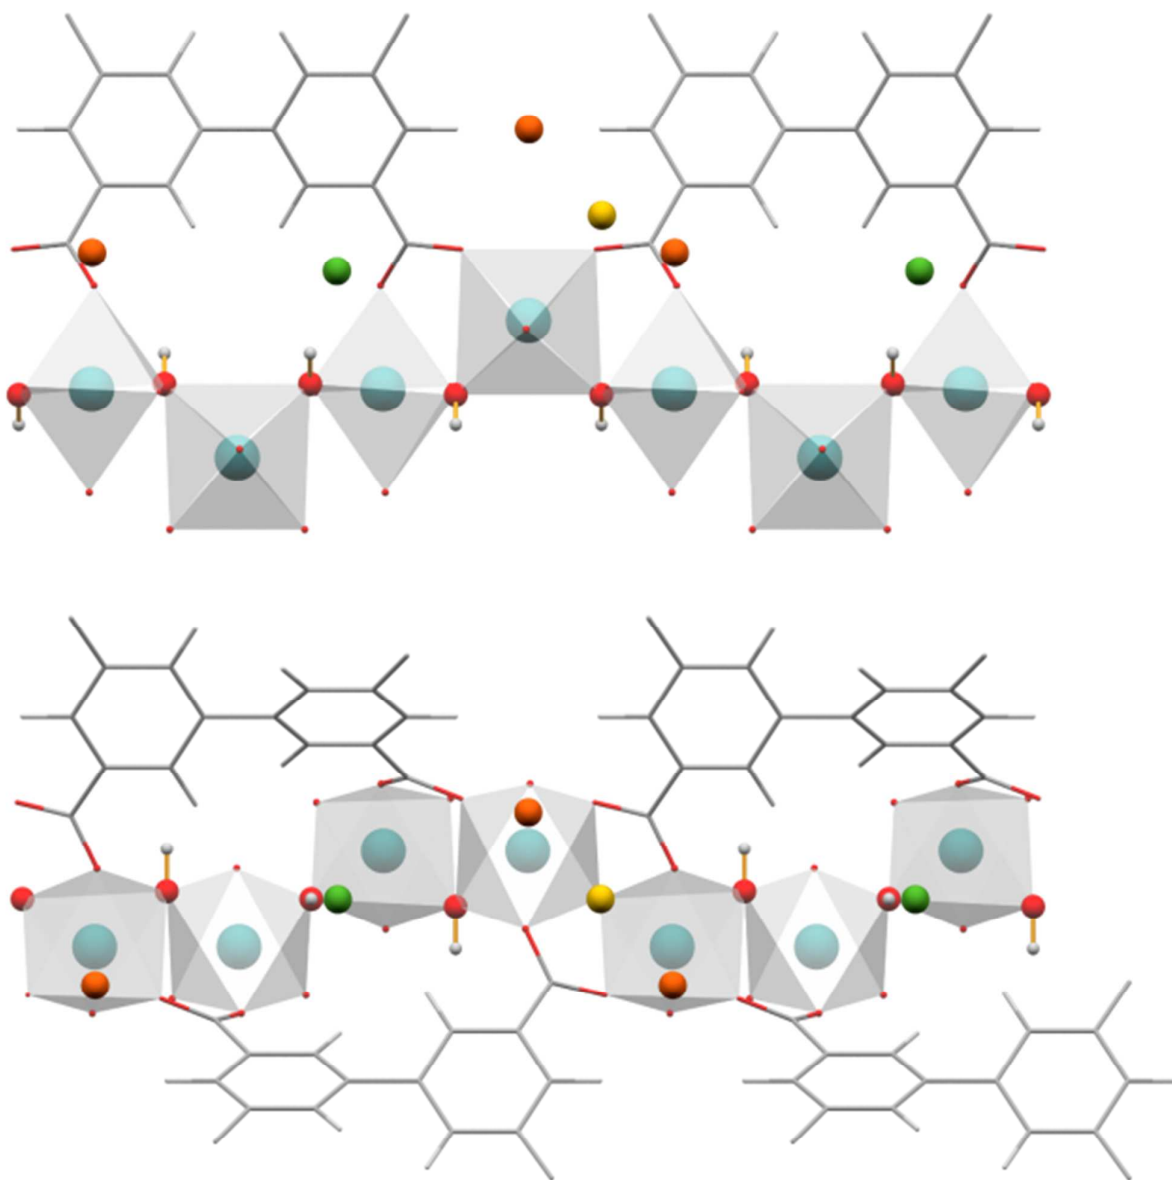

Figure S35 Two views of the *c* crystallographic axis of MFM-300(In) at a gas loading of 1.60 D<sub>2</sub> per In ([In<sub>2</sub>(OH)<sub>2</sub>(C<sub>16</sub>H<sub>6</sub>O<sub>8</sub>)]·3.20 D<sub>2</sub>), highlighting the CD<sub>4</sub> binding sites (Site I, green; Site II, orange; Site III, yellow).

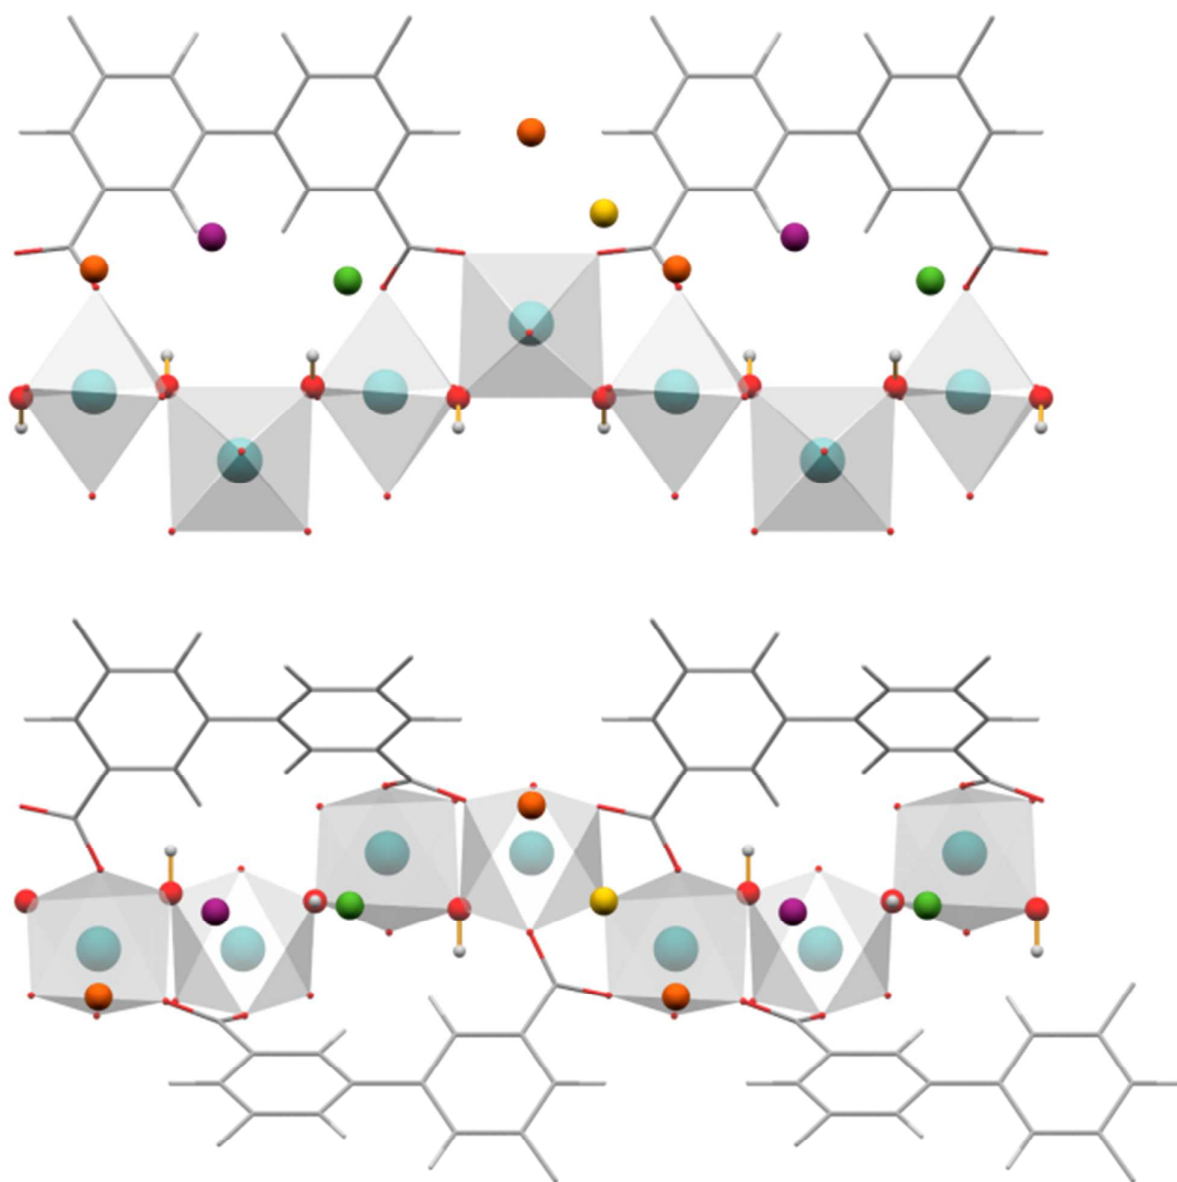

Figure S36 Two views of the *c* crystallographic axis of MFM-300(In) at a gas loading of 2.99 D<sub>2</sub> per In ([In<sub>2</sub>(OH)<sub>2</sub>(C<sub>16</sub>H<sub>6</sub>O<sub>8</sub>)]·5.98 D<sub>2</sub>), highlighting the CD<sub>4</sub> binding sites (Site I, green; Site II, orange; Site III, yellow; Site IV, purple).



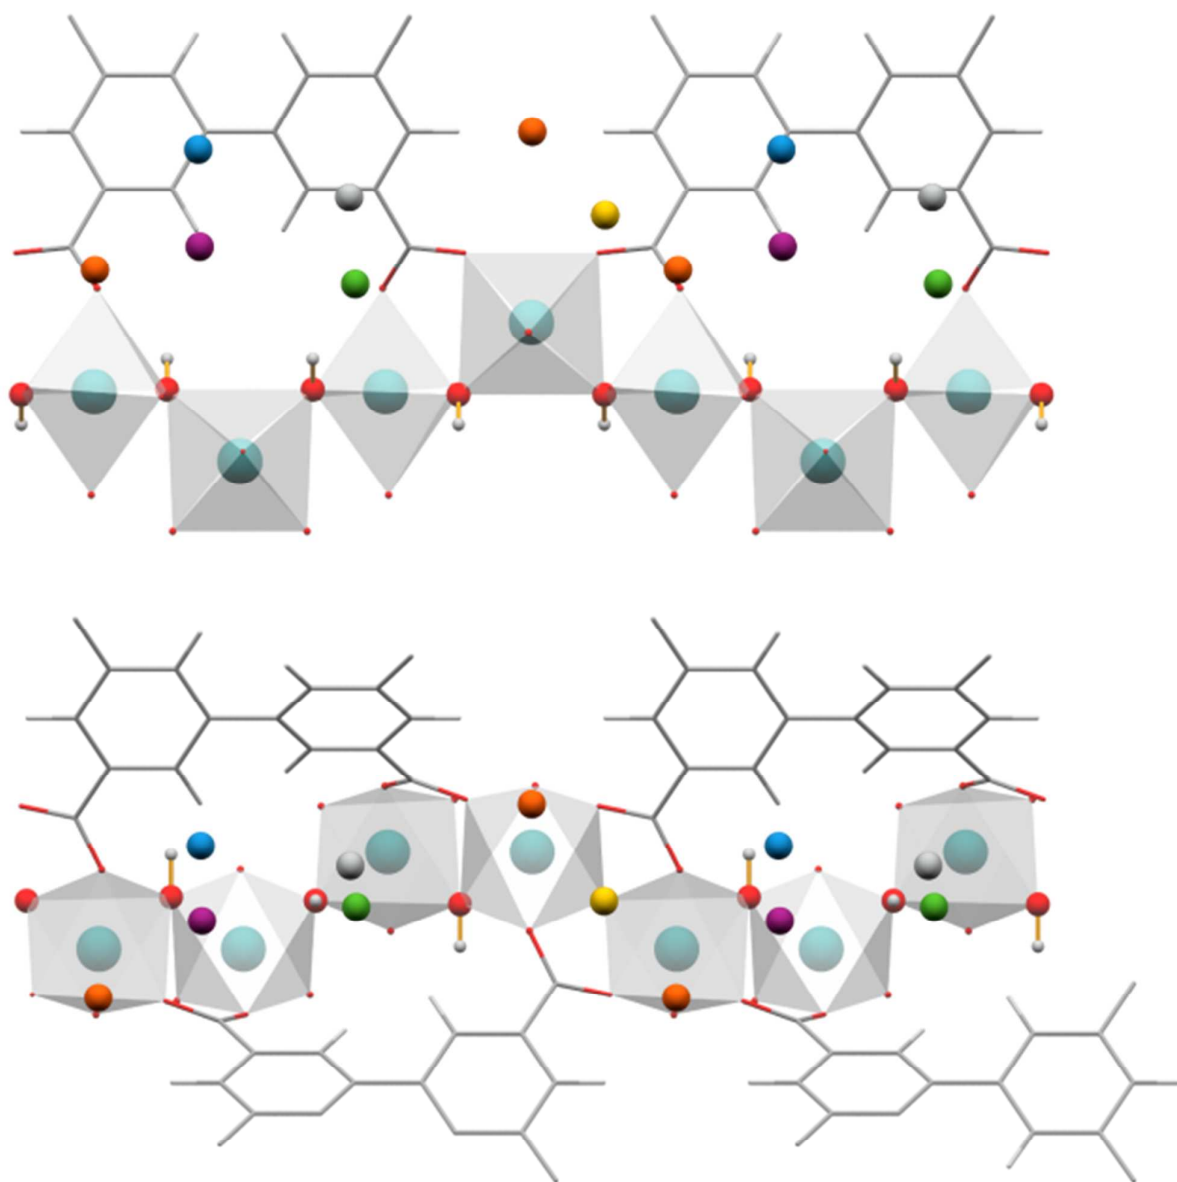

Figure S37 Two views of the *c* crystallographic axis of MFM-300(In) at a gas loading of 4.83 D<sub>2</sub> per In ([In<sub>2</sub>(OH)<sub>2</sub>(C<sub>16</sub>H<sub>6</sub>O<sub>8</sub>)]·9.66 D<sub>2</sub>), highlighting the CD<sub>4</sub> binding sites (Site I, green; Site II, orange; Site III, yellow; Site IV, purple, Site V, blue, Site VI, grey).

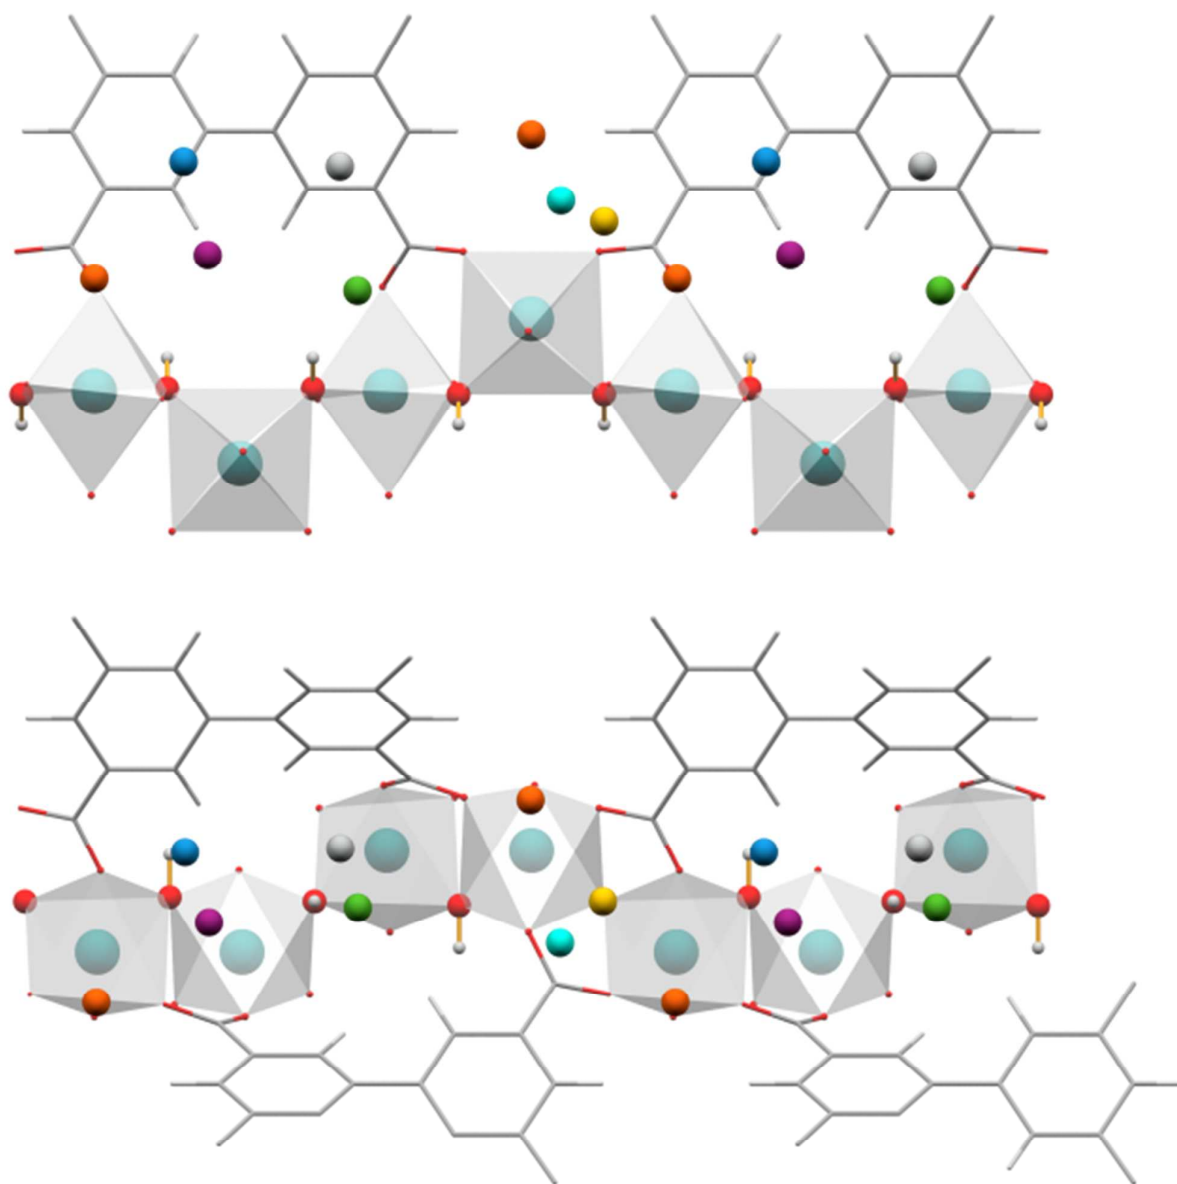

Figure S38 Two views of the *c* crystallographic axis of MFM-300(In) at a gas loading of 6.08 D<sub>2</sub> per In ([In<sub>2</sub>(OH)<sub>2</sub>(C<sub>16</sub>H<sub>6</sub>O<sub>8</sub>)]·12.16 D<sub>2</sub>), highlighting the CD<sub>4</sub> binding sites (Site I, green; Site II, orange; Site III, yellow; Site IV, purple, Site V, blue, Site VI, grey, Site VII, light blue).

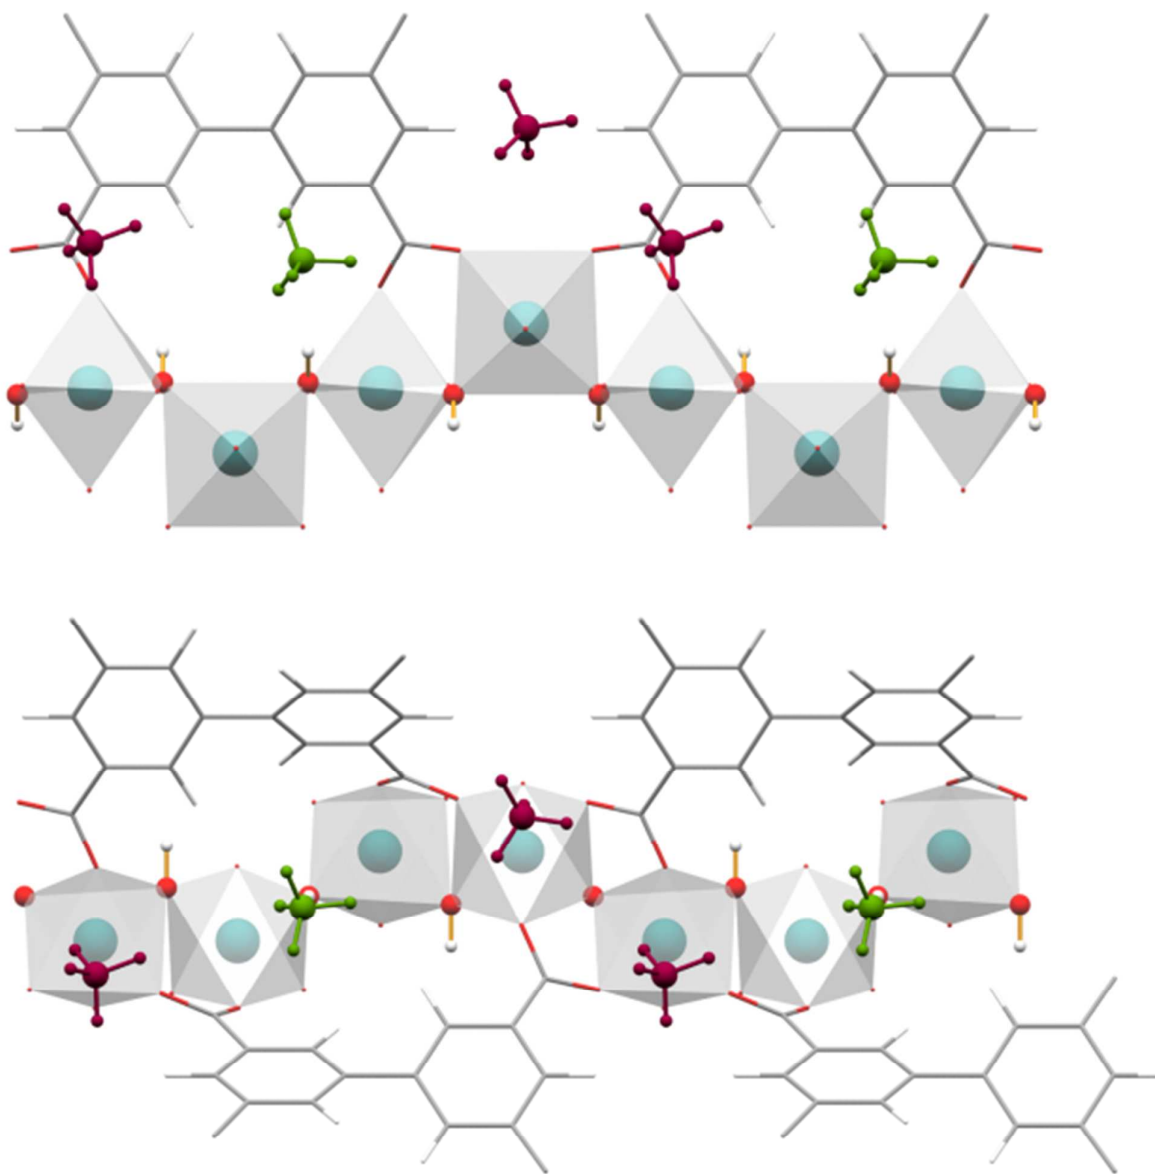

Figure S39 Two views of the *c* crystallographic axis of MFM-300(In) at a gas loading of 1.09 CD<sub>4</sub> per In ([In<sub>2</sub>(OH)<sub>2</sub>(C<sub>16</sub>H<sub>6</sub>O<sub>8</sub>)]·2.18CD<sub>4</sub>), highlighting the CD<sub>4</sub> binding sites (Site I, green; Site II, red).

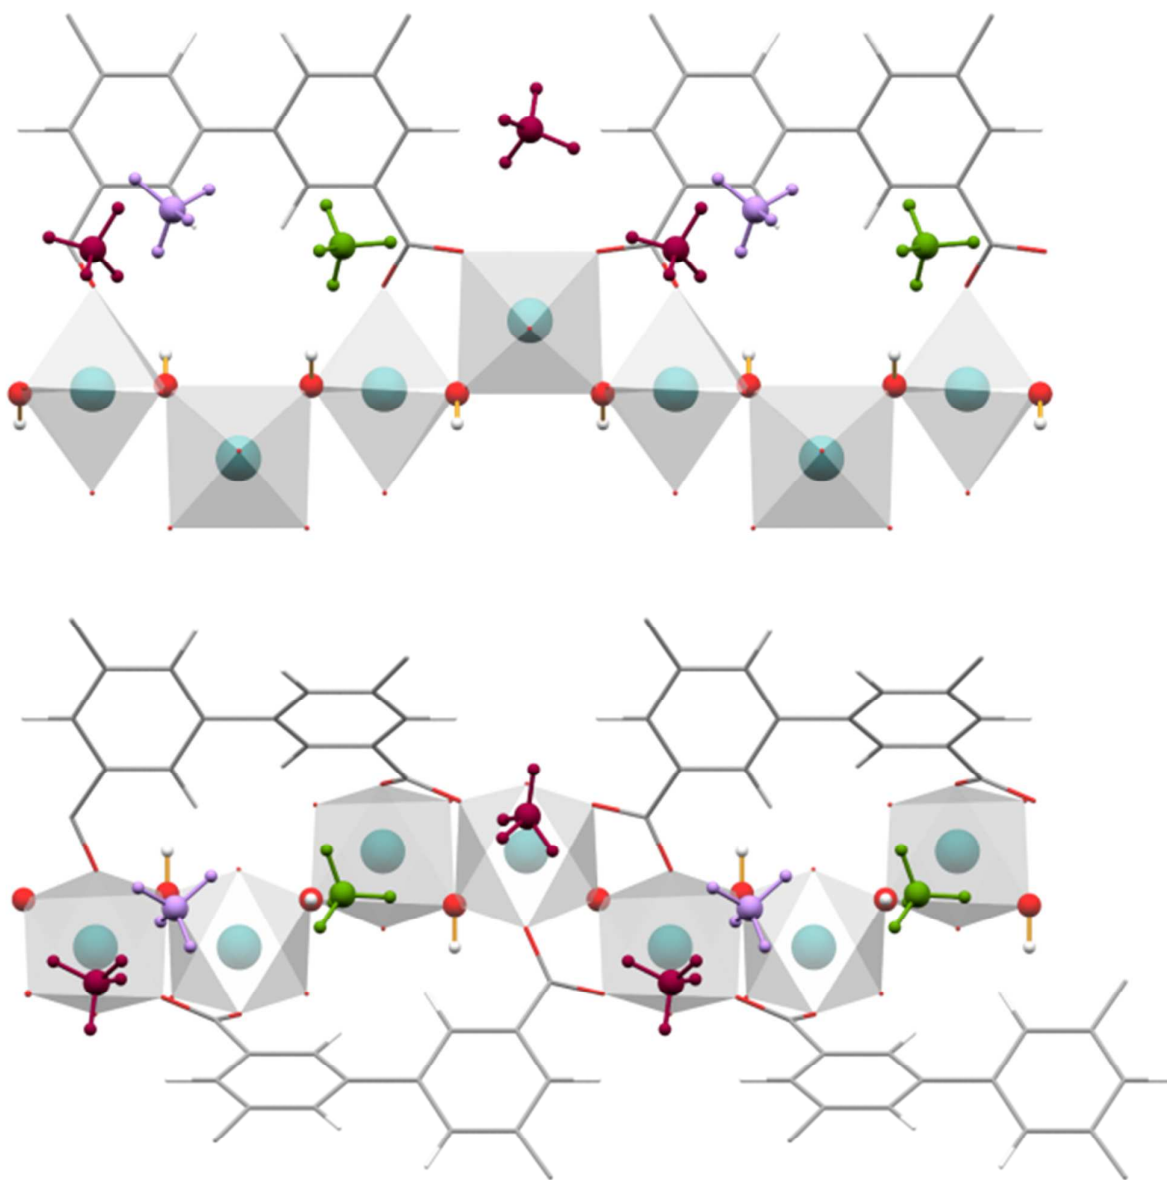

Figure S40 Two views of the *c* crystallographic axis of MFM-300(In) at a gas loading of 2.09 CD<sub>4</sub> per In ([In<sub>2</sub>(OH)<sub>2</sub>(C<sub>16</sub>H<sub>6</sub>O<sub>8</sub>)]·4.18CD<sub>4</sub>), highlighting the CD<sub>4</sub> binding sites (Site I, green; Site II, red; Site III, purple).

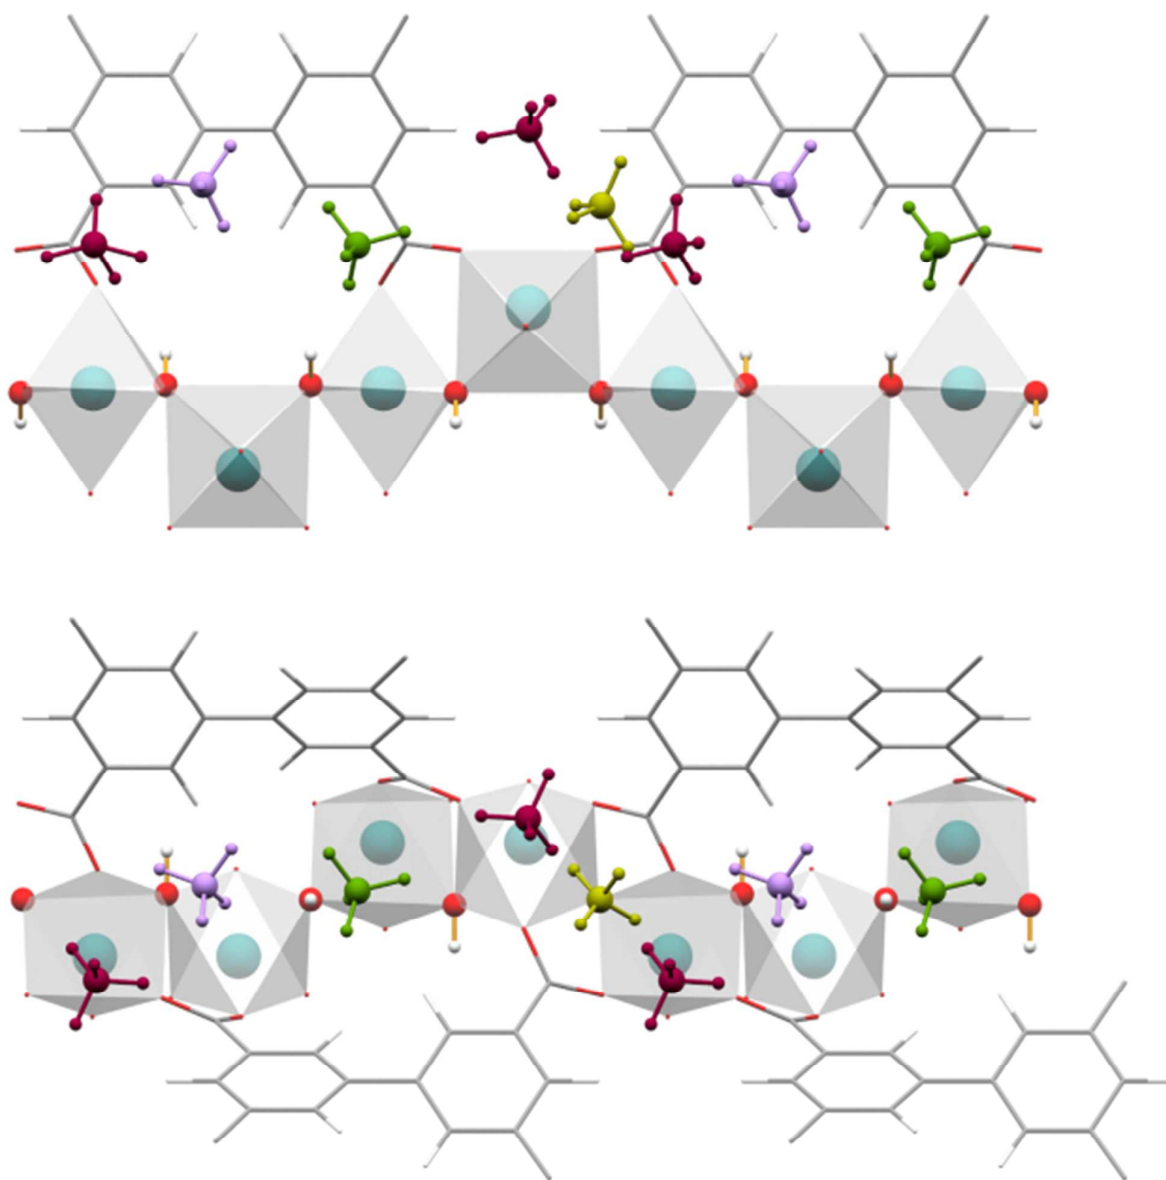

Figure S41 Two views of the *c* crystallographic axis of MFM-300(In) at a gas loading of 3.11 CD<sub>4</sub> per In ([In<sub>2</sub>(OH)<sub>2</sub>(C<sub>16</sub>H<sub>6</sub>O<sub>8</sub>)]·6.22CD<sub>4</sub>), highlighting the CD<sub>4</sub> binding sites ((Site I, green; Site II, orange; Site III, yellow; Site IV, purple; Site V, blue; Site VI, grey; Site VII, light blue)).

## Neutron Scattering Measurements

Inelastic Neutron Scattering experiments were carried out at TOSCA,<sup>9</sup> a general purpose inelastic neutron spectrometer at the first target station of the ISIS Facility at the Rutherford Appleton Laboratory (UK).<sup>6</sup> TOSCA is an indirect geometry spectrometer situated 17 m downstream of a 300 K poisoned water moderator, comprised of 130 <sup>3</sup>He detectors in forward and backscattering geometry able to cover the whole range of molecular vibrations from 0 – 4000 cm<sup>-1</sup>.

A sample of desolvated MFM-300(In) was loaded into a cylindrical vanadium sample container with an indium vacuum seal and connected to a gas handling system. The sample was degassed at 10<sup>-7</sup> mbar and 100 °C for 1 day to remove and remaining trace guest water molecules. The temperature during data collection was controlled using a helium cryostat (11 ± 0.2 K). D<sub>2</sub> and CD<sub>4</sub> were dosed at 50 and 150 K respectively to ensure that the compound of interest was present in the gas phase when not adsorbed inside the crystalline structure of MFM-300(In). The sample was dosed from a calibrated volume to 1.0, 2.0, 4.0 and 6.0 H<sub>2</sub> per In and 0.5 and 1.0 CH<sub>4</sub> per In. The sample was then slowly cooled to 7 K to ensure the analysis gas was completely adsorbed with no condensation within the cell, sufficient time was then allowed to reach thermal equilibrium and data collected. The adsorbed gas was removed by heating the sample cell to 373 K, accompanied by returning the adsorbed gas to the dosing volume. When 95 % of the dosed gas had been returned, the sample was connected to a turbomolecular pump and degassed at 10<sup>-7</sup> mbar and 373 K for two hours to ensure complete removal of the adsorbed gas.

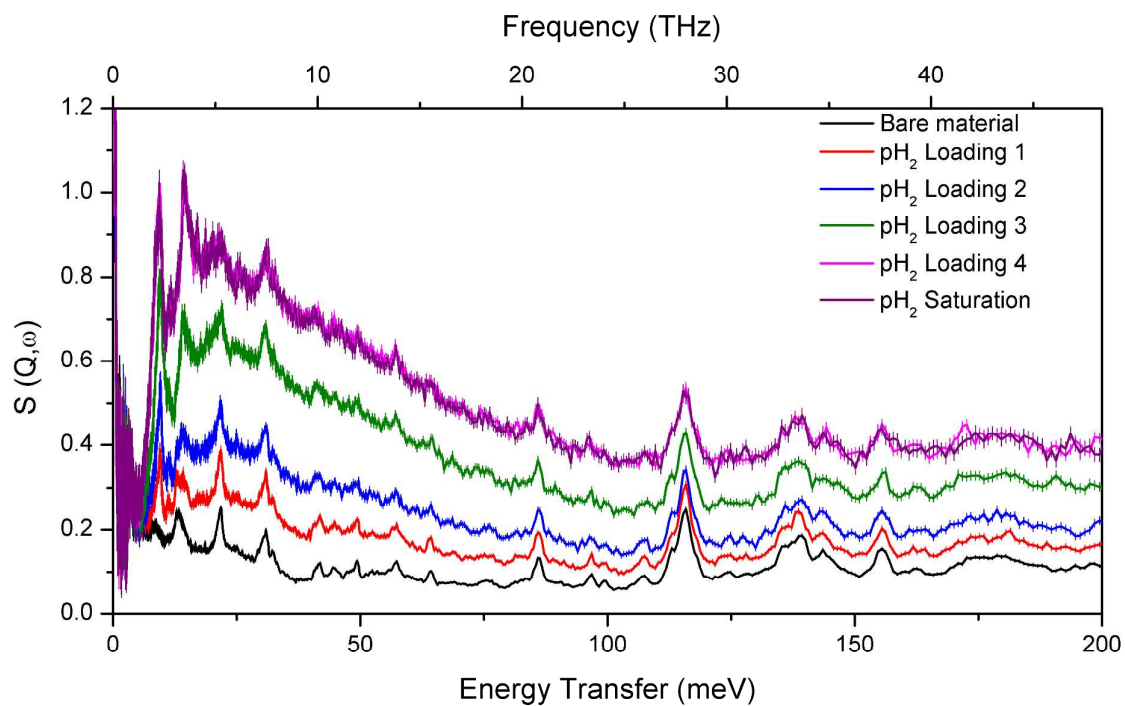

Figure S40 Comparison of the INS spectra of MFM-300(In) for the bare material and at loading of 1.0, 2.0, 4.0 and 6.0  $\text{H}_2$  per In.

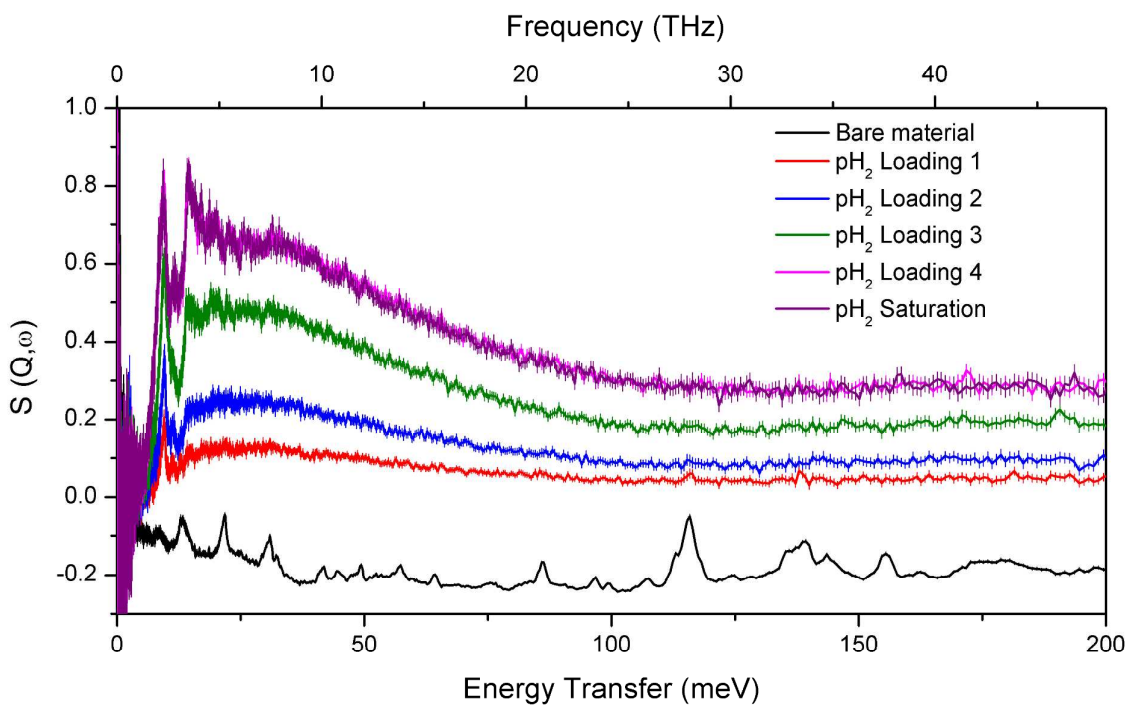

Figure S41 Comparison of the difference INS spectra for MFM-300(In) at loadings of 1.0, 2.0, 4.0 and 6.0  $\text{D}_2$  per In, with the bare material shown at an offset for clarity.

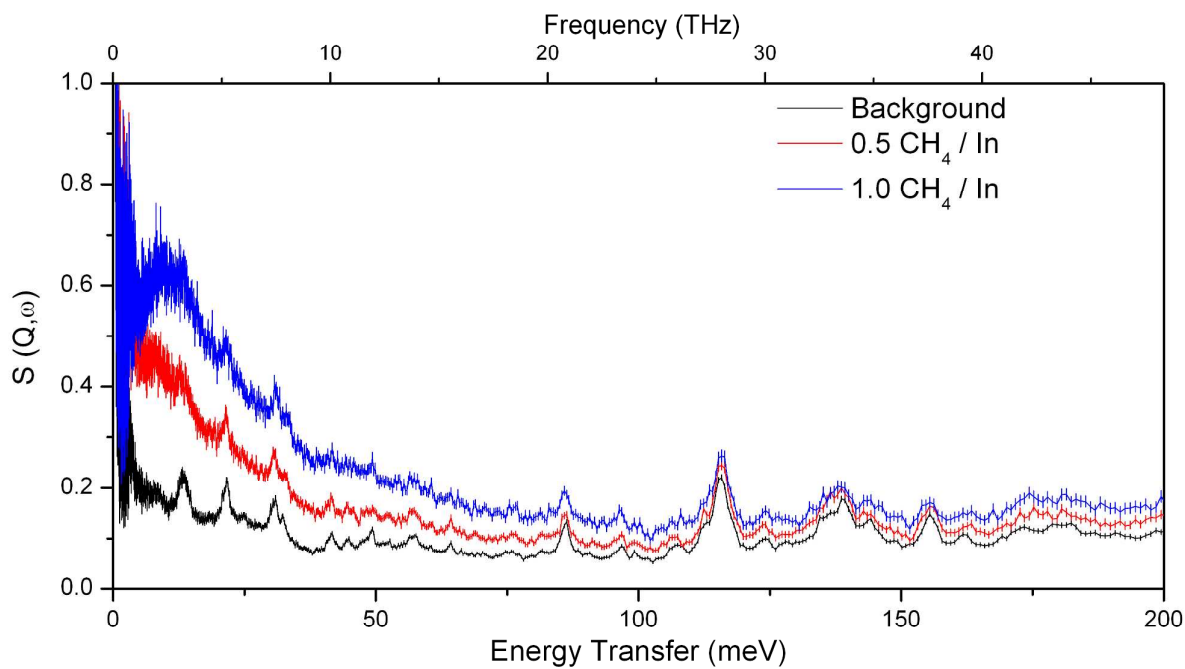

Figure S42 Comparison of the INS spectra for MFM-300(In) for the bare material, and loadings of 0.5 and 1.0 CH<sub>4</sub> per In.

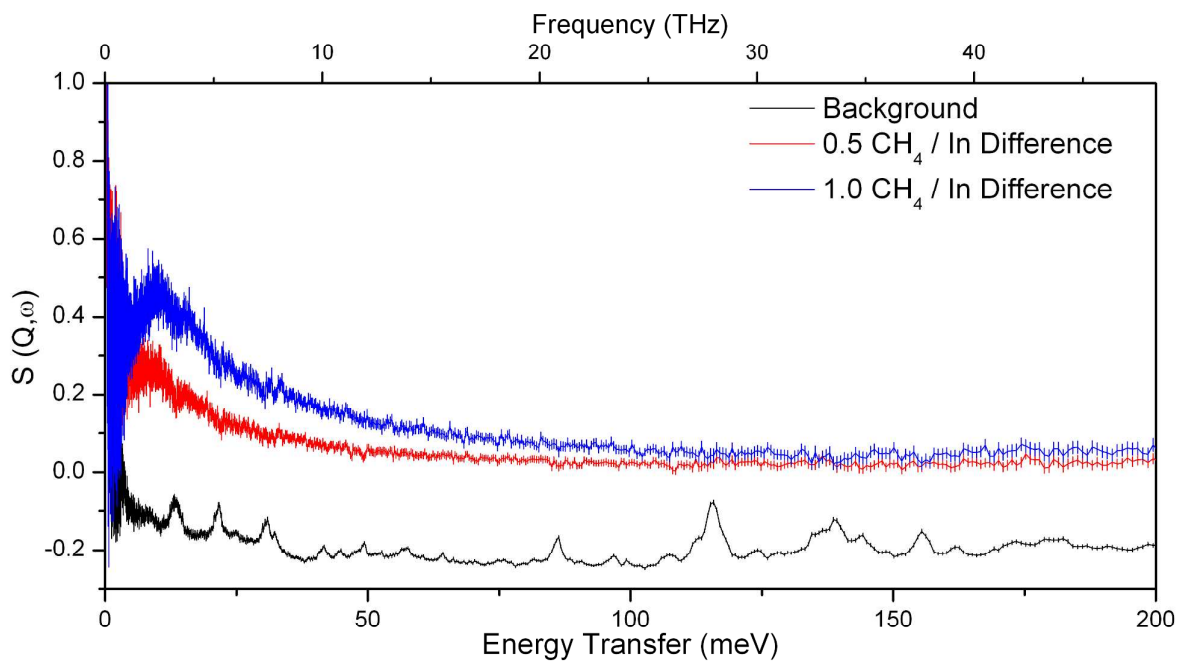

Figure S43 Comparison of the difference INS spectra for MFM-300 (In) at loadings of 0.5 and 1.0 CH<sub>4</sub> per In, with the bare material shown on an offset for clarity.



## Molecular Dynamics Modelling of Inelastic Neutron Spectroscopy (INS)

MD simulations were performed at temperatures ranging from 50 to 250 K. The 250 K simulation was found to give the most appropriate sampling of the potential energy surface (PES) and therefore a hydrogen vibrational density of states in good agreement with the LD calculation and INS experiment was obtained (Figure 5). MD simulations of the CH<sub>4</sub>-loaded MOF allow the vibrational density of states of the CH<sub>4</sub> molecules to be determined.

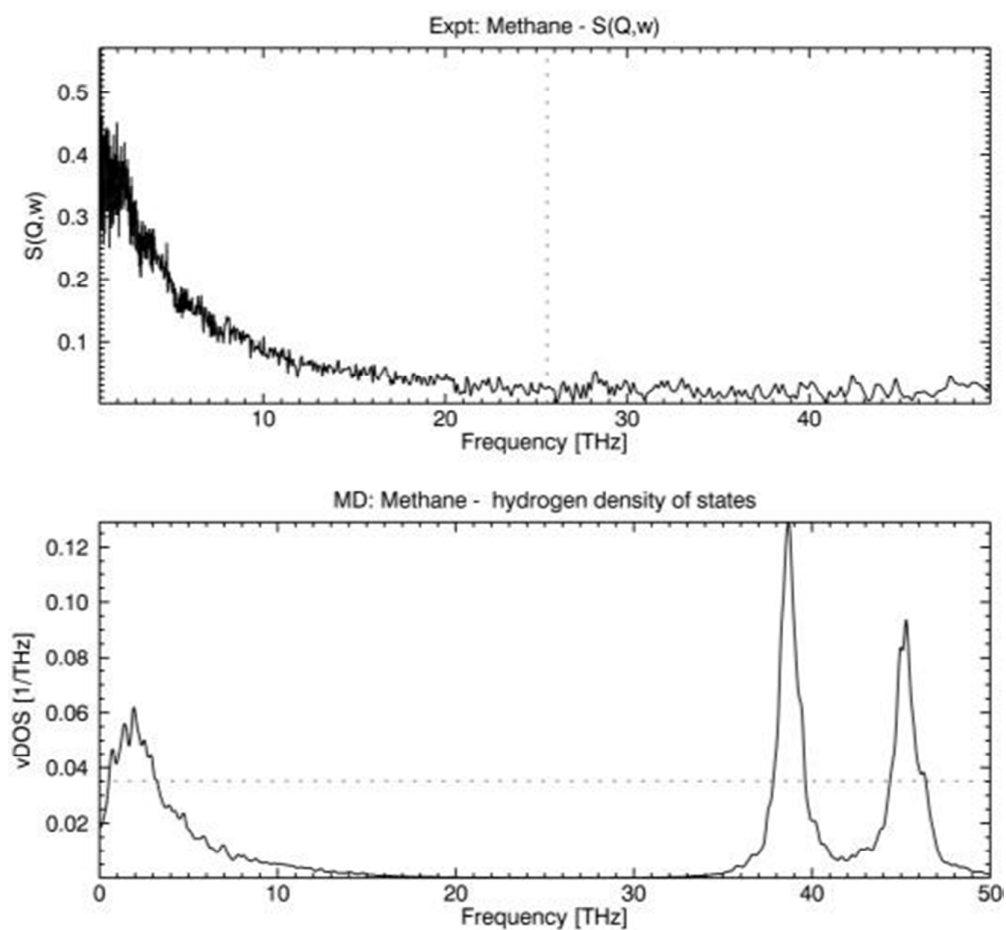

Figure S44 Comparison of the experimental difference INS spectra (top) with that of the calculated spectra (bottom).

## References

1. Thompson S. P.; Parker, J. E.; Potter, J.; Hill, T. P.; Birt, A.; Cobb, T. M.; Yuan, F.; Tang, C. C. *Rev. Sci. Instrum.* **2009**, 80, 075107.
2. Rietveld, H. M. *J. Appl. Crystallogr.* **1969**, 2, 65.
3. Gupta, A.; Chempath, S.; Sanborn, M. J.; Clark, L. A.; Snurr, R. Q. *Mol. Simul.* **2003**, 29, 29.
4. Martin, M. J.; Siepmann, J. I. *J. Phys. Chem. B.* **1998**, 102, 2569.
5. Rappe, A. K.; Casewit, C. J.; Colwell, K.S.; Goddard III, W. A.; Skid, W.M. *J. Am. Chem. Soc.* **1992**, 114, 10024.
6. Perez-Pellitero, J.; Amrouche, H.; Siperstein, F. R.; Pirngruber, G.; Nieto-Draghi, C.; Chaplais, G.; Simon-Masseron, A.; Bazer-Bachi, D.; Peralta, D.; Bats, N. *Chem.-Eur. J.* **2010**, 16, 1560.
7. Peng, D.-Y.; Robinson, D. B. *Ind. Eng. Chem. Fundamen.* **1976**, 15, 59.
8. Chapon, L. C.; Manual, P.; Radelli, P. G.; Benson, C.; Perrott, L.; Ansell, S.; Rhodes, N. J.; Raspino, D.; Duxbury, D.; Spill, E.; Norris, J. *Neutron News* **2011**, 22, 22.
9. Colognesi, D.; Celli, M.; Cilloco, F.; Newport, R. J.; Parker, S. F.; Rossi-Albertini, V.; Sacchetti, F.; Tompkinson, J.; Zoppi, M. *Appl. Phys. A-Mater.* **2002**, 74, S64.
